# Supplementary material
Source: PubMed Central journal article supplement (PMC5994346)
Supplement: NIHMS971761-supplement-Supp_Figures_Tables.pdf [file NIHMS971761-supplement-Supp_Figures_Tables.pdf]

## Supporting Information

# CLMSVault : a software suite for protein cross-linking mass spectrometry data analysis and visualization

*Mathieu Courcelles<sup>1</sup>, Jasmin Coulombe-Huntington<sup>1</sup>, Émilie Cossette<sup>1</sup>, Anne-Claude Gingras<sup>2,3</sup>, Pierre Thibault<sup>1,4</sup>, Mike Tyers<sup>1,5\*</sup>*

<sup>1</sup> Institute for Research in Immunology and Cancer, Université de Montréal, Montréal, Québec H3C 3J7, Canada

<sup>2</sup> Lunenfeld-Tanenbaum Research Institute at Sinai Health Service, Toronto, Ontario, Canada

<sup>3</sup> Department of Molecular Genetics, University of Toronto, Toronto, Ontario, Canada

<sup>4</sup> Department of Chemistry, Université de Montréal, Montréal, Québec H3C 3J7, Canada

<sup>5</sup> Department of Medicine, Université de Montréal, Montréal, Québec H3C 3J7, Canada

\* Correspondence: [md.tyers@umontreal.ca](mailto:md.tyers@umontreal.ca); tel 514-343-6668

## TABLE OF CONTENT:

- **Figure S-1.** User interface screenshots of a cross-linked peptides dataset.
- **Figure S-2.** User interface screenshot of the 3D cross-links viewer
- **Table S-1.** CLMSVault features comparison against other processing pipelines
- **Table S-2.** Cdc34/Ub identified cross-links (XLSX)
- CLMSVault user manual (DOC)

### CI peptides

Add ci peptide

119 results 1220921 total 1 2 [Show all](#)  [Filter](#)

| <input type="checkbox"/> | Pk                     | Run name         | Scan # | M/z    | Z | Score | Error | Display protein1 | Peptide1      | Pep1. Pos. | Pep1 link pos | Display protein2 | Peptide2    | Pep2. Pos. | Pep2 link pos | Link type     | AV | ND |
|--------------------------|------------------------|------------------|--------|--------|---|-------|-------|------------------|---------------|------------|---------------|------------------|-------------|------------|---------------|---------------|----|----|
| <input type="checkbox"/> | <a href="#">481892</a> | Cdc34-Ub_DSS_1mM | 9495   | 759.42 | 3 | 11.89 | -1.13 | hCdc34(7-184)    | KQVLGTK       | 183        | 1             | hCdc34(7-184)    | GKDREYTDIIR | 172        | 2             | Intra-protein | ✓  | ✓  |
| <input type="checkbox"/> | <a href="#">510319</a> | Cdc34-Ub_DSS_1mM | 8559   | 942.20 | 3 | 11.80 | 0.06  | hCdc34(7-184)    | KQVLGTVDAER   | 183        | 7             | hCdc34(7-184)    | KQVLGTVDAER | 183        | 7             | Inter-protein | ✗  | ✓  |
| <input type="checkbox"/> | <a href="#">502440</a> | Cdc34-Ub_DSS_1mM | 7852   | 572.67 | 3 | 11.47 | -0.70 | hCdc34(7-184)    | KQVLGTK       | 183        | 1             | hCdc34(7-184)    | KWKESK      | 166        | 3             | Intra-protein | ✓  | ✓  |
| <input type="checkbox"/> | <a href="#">510540</a> | Cdc34-Ub_DSS_1mM | 8040   | 660.02 | 3 | 11.14 | -0.01 | hCdc34(7-184)    | GKDREYTDIIR   | 172        | 2             | hCdc34(7-184)    | GKDR        | 172        | 2             | Intra-protein | ✗  | ✓  |
| <input type="checkbox"/> | <a href="#">471922</a> | Cdc34-Ub_DSS_1mM | 11576  | 976.19 | 3 | 11.12 | -0.37 | Ub               | IQDKEGIPDPQQR | 30         | 4             | Ub               | MQIFVKTLTGK | 1          | 6             | Intra-protein | ✓  | ✓  |
| <input type="checkbox"/> | <a href="#">502771</a> | Cdc34-Ub_DSS_1mM | 6982   | 682.06 | 3 | 10.98 | -1.39 | hCdc34(7-184)    | WKESKGKDR     | 167        | 5             | hCdc34(7-184)    | KQVLGTK     | 183        | 1             | Intra-protein | ✓  | ✓  |
| <input type="checkbox"/> | <a href="#">472048</a> | Cdc34-Ub_DSS_1mM | 9111   | 770.08 | 3 | 10.87 | -0.66 | hCdc34(7-184)    | GKDREYTDIIR   | 172        | 2             | hCdc34(7-184)    | KWKESK      | 166        | 3             | Intra-protein | ✓  | ✓  |

0 of 100 selected

**Figure S-1.** User interface screenshots of a cross-linked peptides dataset.

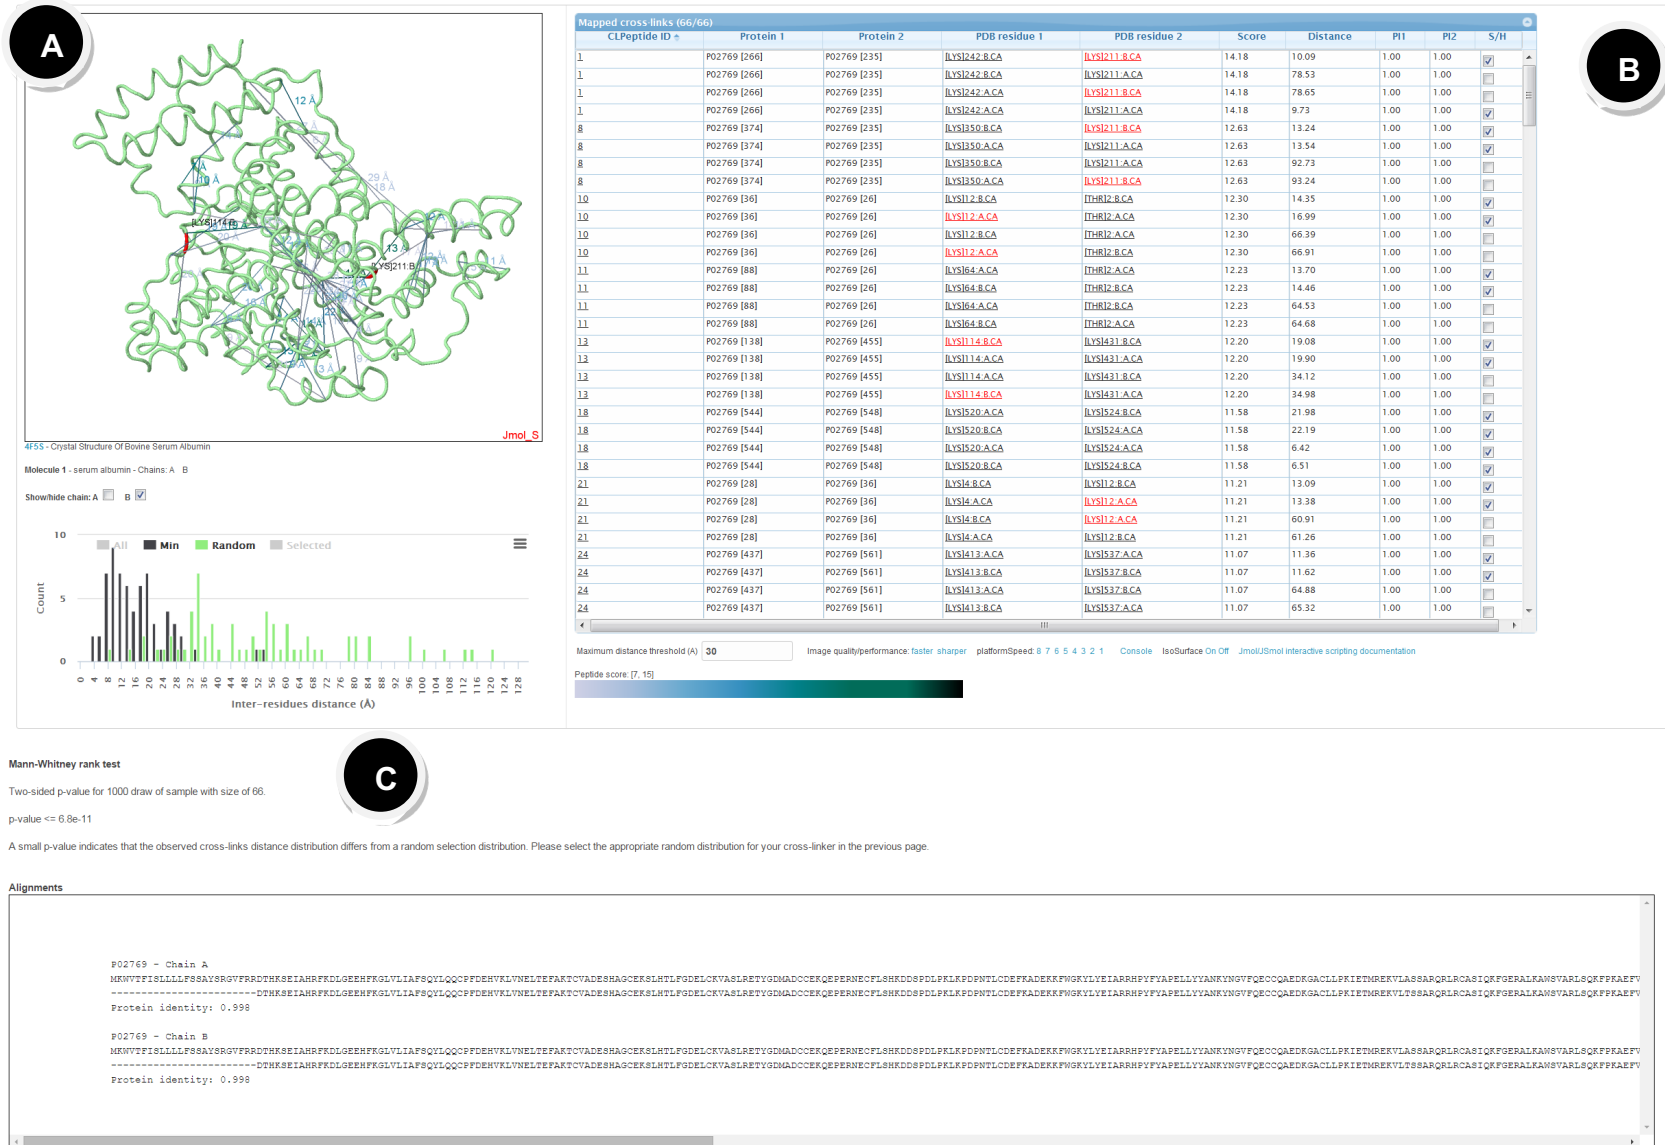

Figure S-2. User interface screenshot of the 3D cross-links viewer

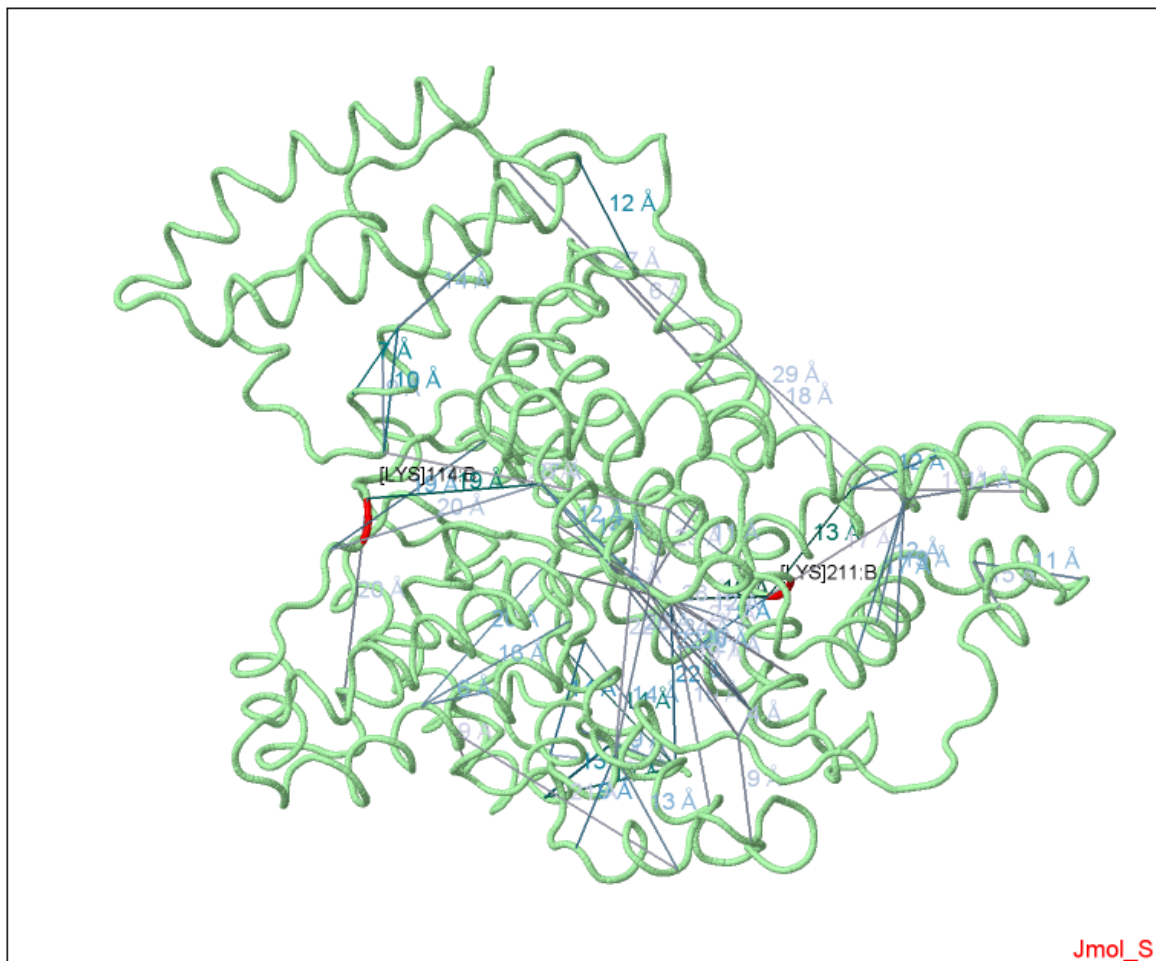

**Figure S-2A.** Zoomed user interface screenshot of the 3D cross-links viewer

| Mapped cross-links (66/66) |              |              |               |               |       |          |      |      |                                     |
|----------------------------|--------------|--------------|---------------|---------------|-------|----------|------|------|-------------------------------------|
| CLPeptide ID               | Protein 1    | Protein 2    | PDB residue 1 | PDB residue 2 | Score | Distance | PI1  | PI2  | S/H                                 |
| 1                          | P02769 [266] | P02769 [235] | [LYS]242:B.CA | [LYS]211:B.CA | 14.18 | 10.09    | 1.00 | 1.00 | <input checked="" type="checkbox"/> |
| 1                          | P02769 [266] | P02769 [235] | [LYS]242:B.CA | [LYS]211:A.CA | 14.18 | 78.53    | 1.00 | 1.00 | <input type="checkbox"/>            |
| 1                          | P02769 [266] | P02769 [235] | [LYS]242:A.CA | [LYS]211:B.CA | 14.18 | 78.65    | 1.00 | 1.00 | <input type="checkbox"/>            |
| 1                          | P02769 [266] | P02769 [235] | [LYS]242:A.CA | [LYS]211:A.CA | 14.18 | 9.73     | 1.00 | 1.00 | <input checked="" type="checkbox"/> |
| 8                          | P02769 [374] | P02769 [235] | [LYS]350:B.CA | [LYS]211:B.CA | 12.63 | 13.24    | 1.00 | 1.00 | <input checked="" type="checkbox"/> |
| 8                          | P02769 [374] | P02769 [235] | [LYS]350:A.CA | [LYS]211:A.CA | 12.63 | 13.54    | 1.00 | 1.00 | <input checked="" type="checkbox"/> |
| 8                          | P02769 [374] | P02769 [235] | [LYS]350:B.CA | [LYS]211:A.CA | 12.63 | 92.73    | 1.00 | 1.00 | <input type="checkbox"/>            |
| 8                          | P02769 [374] | P02769 [235] | [LYS]350:A.CA | [LYS]211:B.CA | 12.63 | 93.24    | 1.00 | 1.00 | <input type="checkbox"/>            |
| 10                         | P02769 [36]  | P02769 [26]  | [LYS]112:B.CA | [THR]2:B.CA   | 12.30 | 14.35    | 1.00 | 1.00 | <input checked="" type="checkbox"/> |
| 10                         | P02769 [36]  | P02769 [26]  | [LYS]112:A.CA | [THR]2:A.CA   | 12.30 | 16.99    | 1.00 | 1.00 | <input checked="" type="checkbox"/> |
| 10                         | P02769 [36]  | P02769 [26]  | [LYS]112:B.CA | [THR]2:A.CA   | 12.30 | 66.39    | 1.00 | 1.00 | <input type="checkbox"/>            |
| 10                         | P02769 [36]  | P02769 [26]  | [LYS]112:A.CA | [THR]2:B.CA   | 12.30 | 66.91    | 1.00 | 1.00 | <input type="checkbox"/>            |
| 11                         | P02769 [88]  | P02769 [26]  | [LYS]64:A.CA  | [THR]2:A.CA   | 12.23 | 13.70    | 1.00 | 1.00 | <input checked="" type="checkbox"/> |
| 11                         | P02769 [88]  | P02769 [26]  | [LYS]64:B.CA  | [THR]2:B.CA   | 12.23 | 14.46    | 1.00 | 1.00 | <input checked="" type="checkbox"/> |
| 11                         | P02769 [88]  | P02769 [26]  | [LYS]64:A.CA  | [THR]2:B.CA   | 12.23 | 64.53    | 1.00 | 1.00 | <input type="checkbox"/>            |
| 11                         | P02769 [88]  | P02769 [26]  | [LYS]64:B.CA  | [THR]2:A.CA   | 12.23 | 64.68    | 1.00 | 1.00 | <input type="checkbox"/>            |
| 13                         | P02769 [138] | P02769 [455] | [LYS]114:B.CA | [LYS]431:B.CA | 12.20 | 19.08    | 1.00 | 1.00 | <input checked="" type="checkbox"/> |
| 13                         | P02769 [138] | P02769 [455] | [LYS]114:A.CA | [LYS]431:A.CA | 12.20 | 19.90    | 1.00 | 1.00 | <input checked="" type="checkbox"/> |
| 13                         | P02769 [138] | P02769 [455] | [LYS]114:A.CA | [LYS]431:B.CA | 12.20 | 34.12    | 1.00 | 1.00 | <input type="checkbox"/>            |
| 13                         | P02769 [138] | P02769 [455] | [LYS]114:B.CA | [LYS]431:A.CA | 12.20 | 34.98    | 1.00 | 1.00 | <input type="checkbox"/>            |
| 18                         | P02769 [544] | P02769 [548] | [LYS]520:A.CA | [LYS]524:B.CA | 11.58 | 21.98    | 1.00 | 1.00 | <input checked="" type="checkbox"/> |
| 18                         | P02769 [544] | P02769 [548] | [LYS]520:B.CA | [LYS]524:A.CA | 11.58 | 22.19    | 1.00 | 1.00 | <input checked="" type="checkbox"/> |
| 18                         | P02769 [544] | P02769 [548] | [LYS]520:A.CA | [LYS]524:A.CA | 11.58 | 6.42     | 1.00 | 1.00 | <input checked="" type="checkbox"/> |
| 18                         | P02769 [544] | P02769 [548] | [LYS]520:B.CA | [LYS]524:B.CA | 11.58 | 6.51     | 1.00 | 1.00 | <input checked="" type="checkbox"/> |
| 21                         | P02769 [28]  | P02769 [36]  | [LYS]4:B.CA   | [LYS]12:B.CA  | 11.21 | 13.09    | 1.00 | 1.00 | <input checked="" type="checkbox"/> |
| 21                         | P02769 [28]  | P02769 [36]  | [LYS]4:A.CA   | [LYS]12:A.CA  | 11.21 | 13.38    | 1.00 | 1.00 | <input checked="" type="checkbox"/> |
| 21                         | P02769 [28]  | P02769 [36]  | [LYS]4:B.CA   | [LYS]12:A.CA  | 11.21 | 60.91    | 1.00 | 1.00 | <input type="checkbox"/>            |
| 21                         | P02769 [28]  | P02769 [36]  | [LYS]4:A.CA   | [LYS]12:B.CA  | 11.21 | 61.26    | 1.00 | 1.00 | <input type="checkbox"/>            |
| 24                         | P02769 [437] | P02769 [561] | [LYS]413:A.CA | [LYS]537:A.CA | 11.07 | 11.36    | 1.00 | 1.00 | <input checked="" type="checkbox"/> |
| 24                         | P02769 [437] | P02769 [561] | [LYS]413:B.CA | [LYS]537:B.CA | 11.07 | 11.62    | 1.00 | 1.00 | <input checked="" type="checkbox"/> |
| 24                         | P02769 [437] | P02769 [561] | [LYS]413:A.CA | [LYS]537:B.CA | 11.07 | 64.88    | 1.00 | 1.00 | <input type="checkbox"/>            |
| 24                         | P02769 [437] | P02769 [561] | [LYS]413:B.CA | [LYS]537:A.CA | 11.07 | 65.32    | 1.00 | 1.00 | <input type="checkbox"/>            |

Maximum distance threshold (A)  Image quality/performance: faster sharper platformSpeed: 8 7 6 5 4 3 2 1 Console IsoSurface On Off Jmol/JSmol interactive scripting documentation

**Figure S-2B.** Zoomed user interface screenshot of the 3D cross-links viewer

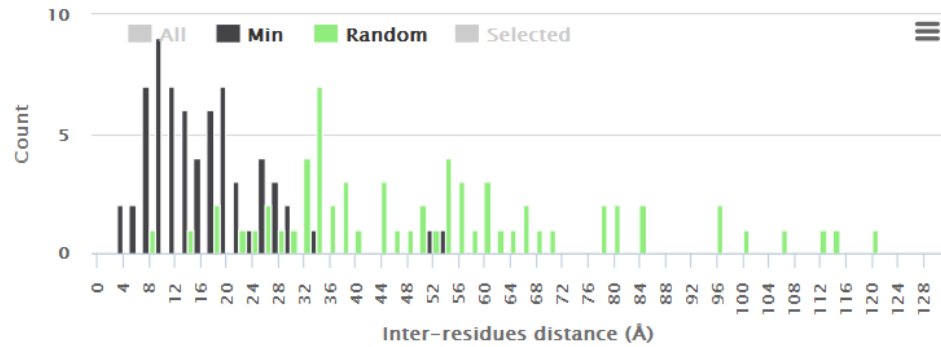

**Mann-Whitney rank test**

Two-sided p-value for 1000 draw of sample with size of 66.

p-value <= 6.8e-11

A small p-value indicates that the observed cross-links distance distribution differs from a random selection distribution. Please select the appropriate random distribution for your cross-linker in the previous page.

**Figure S-2C.** Zoomed user interface screenshot of the 3D cross-links viewer

**Table S-1.** CLMSVault features comparison against other processing pipelines

| Feature                                 | XLinkDB                                                   | ProXL DB                                                     | CLMSVault                                                                                                  |
|-----------------------------------------|-----------------------------------------------------------|--------------------------------------------------------------|------------------------------------------------------------------------------------------------------------|
| Dataset import                          | Tab delimited text file                                   | ProXL XML, converter for Kojak, Crux, pLink, StavroX, xQuest | Results files from pLink, Xi, xQuest, 14N15N DXMSMS, Mascot (dead-end)                                     |
| Dataset export                          | Tab delimited text file                                   | ProXL XML, Tab delimited text file                           | Comma-separated text file, PSI-MI TAB and XML 2.5                                                          |
| Dataset filtering                       | -                                                         | Yes                                                          | Yes                                                                                                        |
| Spectrum viewer                         | -                                                         | Lorikeet                                                     | xiSPEC                                                                                                     |
| Protein network viewer                  | Cytoscape web, xiNET                                      | xVis                                                         | xiNET                                                                                                      |
| Protein interactions reference database | IntAct, EciD                                              | -                                                            | -                                                                                                          |
| Cross-links overlay on PDB structure    | Jmol/JSmol viewer                                         | Pv viewer                                                    | Jmol/JSmol viewer                                                                                          |
| Structure Modeling                      | Modeller, PatchDock                                       | -                                                            | -                                                                                                          |
| Quantitative analysis                   | -                                                         | -                                                            | Cross-links color scheme based on abundance fold change for protein network and structure viewers. Filter. |
| Protein database                        | Uniprot (E. coli, H. sapiens, S. cerevisiae, A. thaliana) | No restriction                                               | No restriction                                                                                             |
| Source code                             | No                                                        | Yes                                                          | Yes                                                                                                        |
