# Supplementary material
Source: PubMed Central journal article supplement (PMC5994346)
Supplement: NIHMS971761-supplement-Supp_Manual.pdf [file NIHMS971761-supplement-Supp_Manual.pdf]

**User manual**

# **CLMSVault**

Protein cross-linking bioinformatics analysis platform

Written by Mathieu Courcelles

Institute for research in immunology and cancer

Université de Montréal

Last update: 2017/04/10

CLMSVault by Mathieu Courcelles is licensed under a [Creative Commons Attribution-NonCommercial 4.0 International License](https://creativecommons.org/licenses/by-nc/4.0/).

Copyright © 2012-2017 [IRIC](#) - [Mike Tyers lab](#)

## Table of Contents

|                                                          |    |
|----------------------------------------------------------|----|
| 1. Introduction.....                                     | 4  |
| 2. Installation.....                                     | 4  |
| 3. First login.....                                      | 4  |
| 4. Data import and storage .....                         | 7  |
| 4.1. Protein sequence databases.....                     | 7  |
| 4.2. Cross-link datasets .....                           | 9  |
| 4.3. MS/MS spectra.....                                  | 12 |
| 4.4. PDB models.....                                     | 14 |
| 4.4. Quantification datasets .....                       | 16 |
| 5. Cross-link datasets filtering and merging.....        | 19 |
| 5.1. Filters.....                                        | 19 |
| 5.2. Creation of processed dataset .....                 | 21 |
| 5.3. Creation of processed dataset with Percolator ..... | 23 |
| 6. Analysis, visualization, and export.....              | 27 |
| 6.1. List, view, and delete.....                         | 27 |
| 6.2. CL Peptides view .....                              | 29 |
| 6.3. Spectrum viewer .....                               | 32 |
| 6.4. View in XiNET .....                                 | 33 |
| 6.5. View in JSMol .....                                 | 34 |
| 6.6. Export dataset statistics to CSV .....              | 40 |
| 6.7. Export cross-linked peptides comparison to CSV..... | 40 |
| 6.8. Export as Interaction matrix .....                  | 42 |
| 6.9. Export as Percolator TSV .....                      | 42 |
| 6.10. Export as Xi CSV.....                              | 43 |
| 6.11. Export as Xi CSV with distance .....               | 44 |
| 6.12. Export as PSI-MI TAB 2.5.....                      | 44 |
| 6.13. Export as PSI-MI XML 2.5.....                      | 45 |
| 6.14. Export as xTract CSV .....                         | 45 |
| 6.15. Export as ProteoProfile CSV .....                  | 45 |

|                              |    |
|------------------------------|----|
| 7. Administrative task ..... | 47 |
| 7.1. Add new user .....      | 47 |

## 1. Introduction

CLMSVault is a bioinformatics platform for protein cross-linking mass spectrometry analyses. An overview of its functionalities is presented in this manual. The diagram below present the data processing workflow provided by CLMSVault. CLMSVault takes over the analysis next to the cross-link identification step.

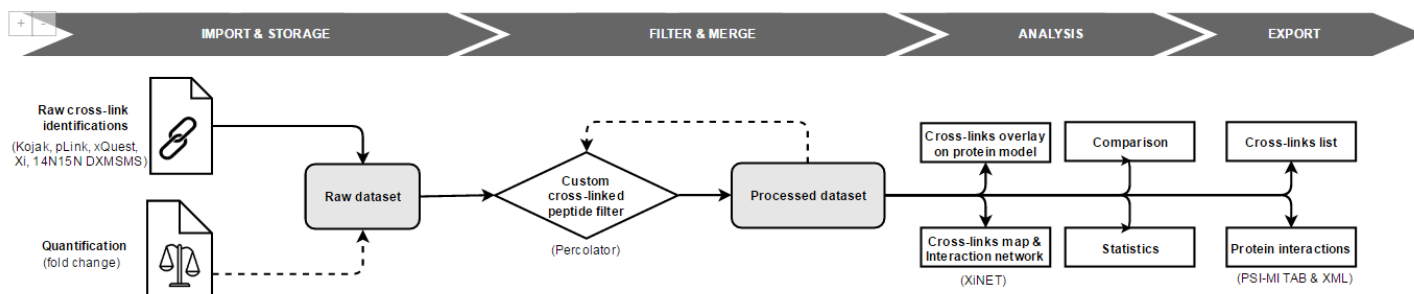

## 2. Installation

CLMSVault is an open source project available here: <https://gitlab.com/courcelm/clmsvault>.

Please refer to installation note file to deploy it under Linux or Windows.

## 3. First login

To access CLMSVault, open your web browser of choice and enter the URL to where it was deployed (default: <http://localhost:8000>). The login view should be displayed if the installation worked successfully.

## CLMSVault - Protein cross-linking mass spectrometry analysis platform

Login

**Username**

**Password**

[Log in](#)

Log in using this user/password combination: user name: clmsvault, password: clms123

Refer to section 7.1 to add more users. After login, you will be presented CLMSVault workflow view from which you can access its functionalities.

CLMSVault - Protein cross-linking mass spectrometry analysis platform
demo

Home

### Welcome to CLMSVault

CLMSVault is a web based software for storing, processing and visualizing protein cross-linking datasets. Please follow the workflow below to get started:

IMPORT & STORAGE

FILTER & MERGE

ANALYSIS

EXPORT

Step 1: Import and store

[Import protein sequences](#)

[Import cross-links and create raw dataset](#)

Optional:  
[Import PDB model](#)

Optional:  
[Import quantification data](#)

Step 2: Dataset processing

[Create cross-linked peptide filter](#)

[Create processed dataset!](#)

Step 3: Analysis and export

[Browse processed datasets](#)

Select dataset using checkbox and use the action bottom left dropdown to access analysis and export tools.

Quick links

Recent Actions

CLMSVault processing workflow is divided into three main steps:

- Data import and storage (section 4)
- Cross-link datasets filtering and merging (section 5)
- Analysis, visualization, and export (section 6)

## 4. Data import and storage

### 4.1. Protein sequence databases

CLMSVault requires protein sequences for its different visualizations. The user must first imports protein sequences in FASTA format before loading any cross-link dataset.

1. Click on “Import protein sequences” from the main screen.

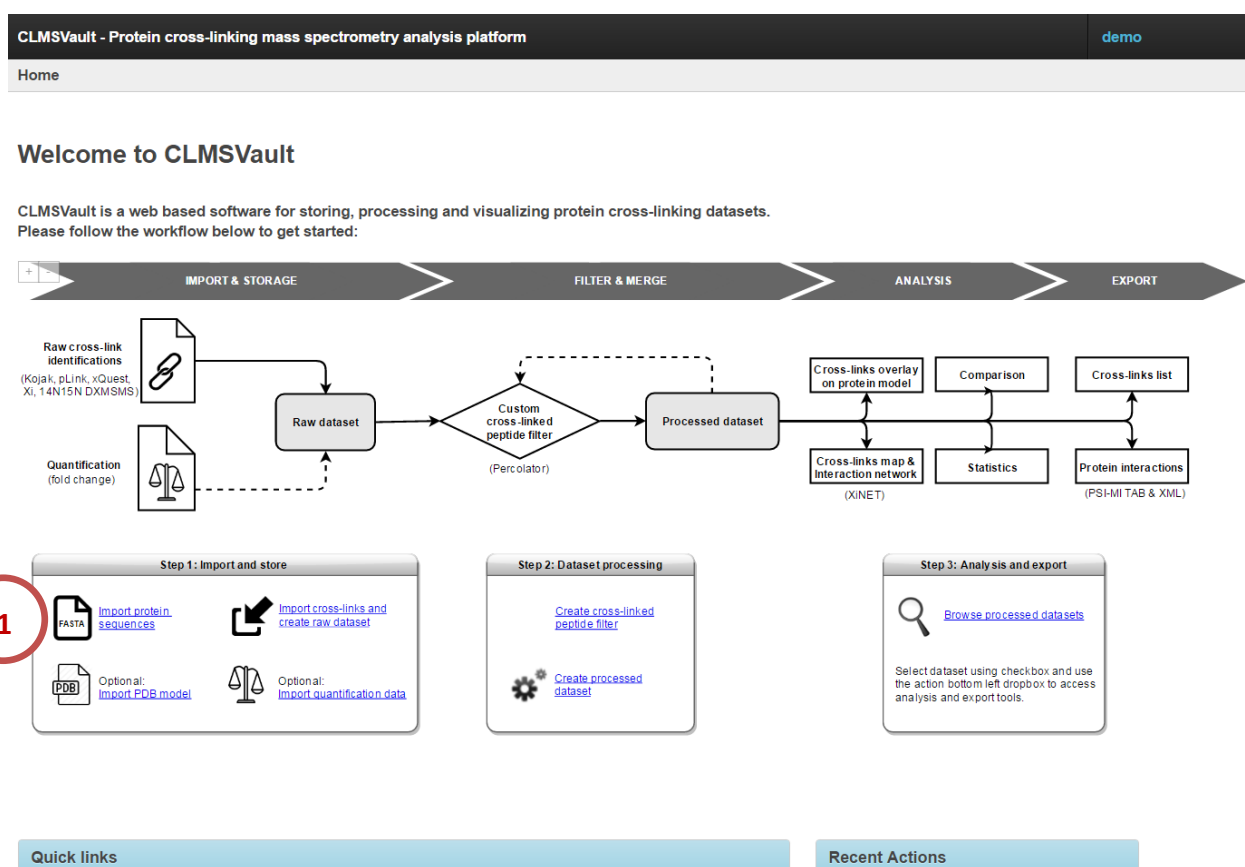

2. Fill out the form. Regular expressions are used to extract identifier (mandatory), gene name, description and species from the FASTA file. If you are unfamiliar with regular expression or you would like to test them before, we recommend using the following tool: <https://regex101.com/#python>

CLMSVault - Protein cross-linking mass spectrometry analysis platform demo

Home > Clmsvault\_App > Fasta dbs > Add fasta db

### Add fasta db

|                    |                                                                                                                                  |
|--------------------|----------------------------------------------------------------------------------------------------------------------------------|
| Name               | BSA                                                                                                                              |
| File               | Choose file   No file chosen<br><small>Select FASTA file.</small>                                                                |
| Identifier regexp  | ^.+ (.+)                                                                                                                         |
| Gene name regexp   | GN=([^\s]+)                                                                                                                      |
| Description regexp | ^.+? s(.+)OS=                                                                                                                    |
| Species regexp     | OS=(.+)\sGN=                                                                                                                     |
|                    | <input checked="" type="checkbox"/> Update<br><small>Trigger update for fields regexp. Will not stay checked after save.</small> |
| Parsing log        | (None)                                                                                                                           |
| Parsing status     | <span style="color: red;">-</span>                                                                                               |
| Sequence count     | 0                                                                                                                                |

Save and continue editing Save and add another Save

3. Click "Save".

4. Check parsing status to verify that protein sequences were imported correctly.

CLMSVault - Protein cross-linking mass spectrometry analysis platform demo

Home > Clmsvault\_App > Fasta dbs

### Fasta dbs

Add fasta db

1 total

< 2014 November 26

| <input type="checkbox"/> | Pk | Name | File                | Sequence count | Parsing status | Sequences | Creation date            |
|--------------------------|----|------|---------------------|----------------|----------------|-----------|--------------------------|
| <input type="checkbox"/> | 1  | BSA  | FastaDB/1-BSA.fasta | 1              | ✔              | See       | Nov. 26, 2014, 2:37 p.m. |

1 total

1. Click "See" to double check protein import by listing imported proteins.



CLMSVault - Protein cross-linking mass spectrometry analysis platform demo

Home > Clmsvault\_App > Fasta db\_sequences

### Fasta db\_sequences Add fasta db\_sequence

1 total Filter

| <input type="checkbox"/> | Pk | Fastadb | Identifier | Gene name | Description   | Species    |
|--------------------------|----|---------|------------|-----------|---------------|------------|
| <input type="checkbox"/> | 1  | [1]BSA  | P02769     | ALB       | Serum albumin | Bos taurus |

1 total

5

 CLMSVault by Mathieu Courcelles is licensed under a Creative Commons Attribution-NonCommercial 4.0 International License. Copyright © 2012-2015 IRIC - Mike Tyers lab.

----- 0 of 1 selected

## 4.2. Cross-link datasets

CLMSVault imports cross-link results from the following search engine: Kojak, pLink, xQuest, Xi, 14N 15N DXMSMS. Note: some older or recent version of these softwares might not be yet supported. Cross-link datasets are organized into project to facilitate data access.

1. Click on “Import cross-links and create raw dataset” from the main screen.

## Welcome to CLMSVault

CLMSVault is a web based software for storing, processing and visualizing protein cross-linking datasets. Please follow the workflow below to get started:

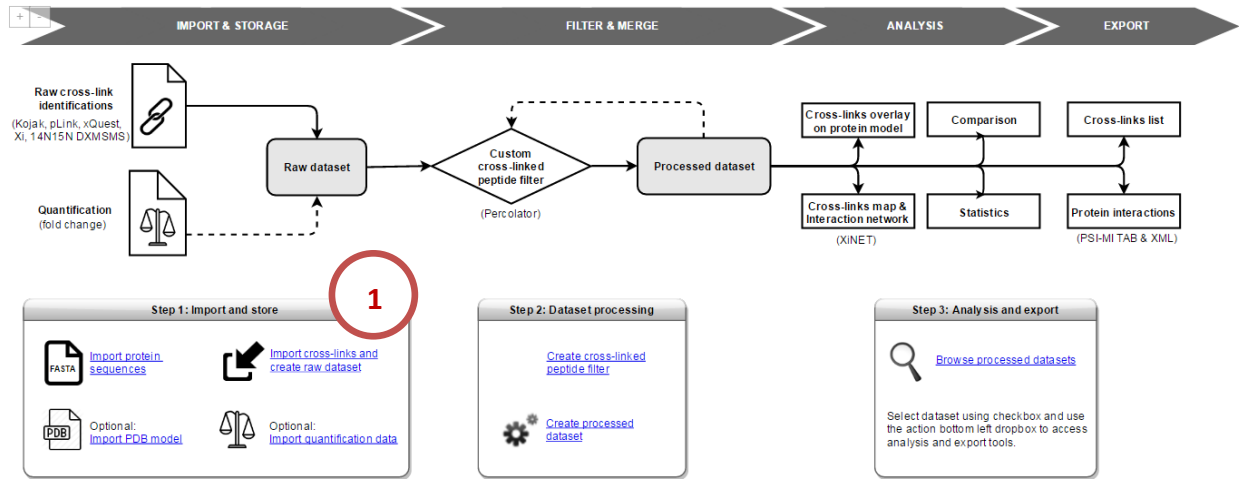

Quick links

Recent Actions

2. Fill out the form.

CLMSVault - Protein cross-linking mass spectrometry analysis platform demo

Home > Cimsvault\_App > Raw datasets > Add raw dataset

### Add raw dataset

|                      |                                                                                                                                                                                                       |
|----------------------|-------------------------------------------------------------------------------------------------------------------------------------------------------------------------------------------------------|
| Name                 | <input type="text" value="BSA demo"/>                                                                                                                                                                 |
| Project              | [1] BSA demo <span>+</span>                                                                                                                                                                           |
| Cross linker         | DSS <span>▾</span>                                                                                                                                                                                    |
| Instrument name      | Q-Exactive <span>▾</span>                                                                                                                                                                             |
| Fasta db             | [1] BSA <span>+</span>                                                                                                                                                                                |
| Search algorithm     | Xi <span>▾</span>                                                                                                                                                                                     |
| Detailed description | <div style="border: 1px solid #ccc; height: 40px;"></div>                                                                                                                                             |
| File                 | <input type="button" value="Choose file"/> 1-BSA_DSS_2..._gte_6.csv<br><small>pLink note: Merge the files ending with xlink_qry.proteins.txt from 1.sample\search folder.</small>                     |
| Extra file           | <input type="button" value="Choose file"/> No file chosen<br><small>pLink only: select pLink_combine.spectra.xls from 2.report\sample1 folder. This file is used to filter FDR filtered hits.</small> |
| Parsing log          | (None)                                                                                                                                                                                                |
| Parsing status       | <span style="color: red;">-</span>                                                                                                                                                                    |

3. Click "Save".
4. Verify that dataset import was successful.
5. Click "See" to view imported cross-linked peptides.

CLMSVault - Protein cross-linking mass spectrometry analysis platform demo

Home > Cimsvault\_App > Raw datasets

### Raw datasets Add raw dataset

1 total Filter

< 2014 November 26

| PK | Name               | Project      | File                                            | Cross linker | Fasta db | Search algorithm | Parsing status | Creation date            | CLPeptides          |
|----|--------------------|--------------|-------------------------------------------------|--------------|----------|------------------|----------------|--------------------------|---------------------|
| 1  | BSA_DSS_2013-10-02 | [1] BSA demo | RawDataset/1-BSA_DSS_2013-10-02_score_gte_6.csv | DSS          | [1] BSA  | Xi               |                | Nov. 26, 2014, 2:56 p.m. | <a href="#">See</a> |

1 total

CLMSVault by Mathieu Courcelles is licensed under a Creative Commons Attribution-NonCommercial 4.0 International License. Copyright © 2012-2015 IRIC - Mike Tyers lab.

----- 0 of 1 selected

Once the cross-links dataset is successfully imported, it is possible to either create a processed dataset (refer to section 5) or apply different actions to analyze it directly (refer to section 6).

### 4.3. MS/MS spectra

MS/MS spectrum of cross-linked peptides can be viewed with the embeded Xi spectrum viewer (refer to section X). MS/MS spectra file are imported into CLMSVault via MGF file which has been generated by msconvert tool from the Proteowizard (<http://proteowizard.sourceforge.net/tools.shtml>). Note that MS/MS spectra must be imported after cross-link identifications.

1. Click on “Expand” from the main screen.
2. Click on “Add” in the “Peak lists” section.

3. Select your MGF file.
4. Click "Save".

CLMSVault - Protein cross-linking mass spectrometry analysis platform demo

---

Home

Step 1: Import and store



Import protein sequences



Import cross-links and create raw dataset



Optional: Import PDB model



Optional: Import quantification data

Step 2: Dataset processing

Create cross-linked peptide filter

Create processed dataset

Step 3: Analysis and export

Browse processed datasets

Select dataset using checkbox and use the action bottom left dropdown to access analysis and export tools.

Quick links

|                    |                |
|--------------------|----------------|
| Clmsvault_App      |                |
| Cl peptide filters | + Add ≡ Change |
| Cl peptides        | + Add ≡ Change |
| Cross linkers      | + Add ≡ Change |
| Fasta db_sequences | + Add ≡ Change |
| Fasta dbs          | + Add ≡ Change |
| Instruments        | + Add ≡ Change |
| Pdbs               | + Add ≡ Change |
| Peak lists         | + Add ≡ Change |
| Processed datasets | + Add ≡ Change |
| Projects           | + Add ≡ Change |
| Quantifications    | + Add ≡ Change |
| Raw datasets       | + Add ≡ Change |
| Search algorithms  | + Add ≡ Change |

Recent Actions

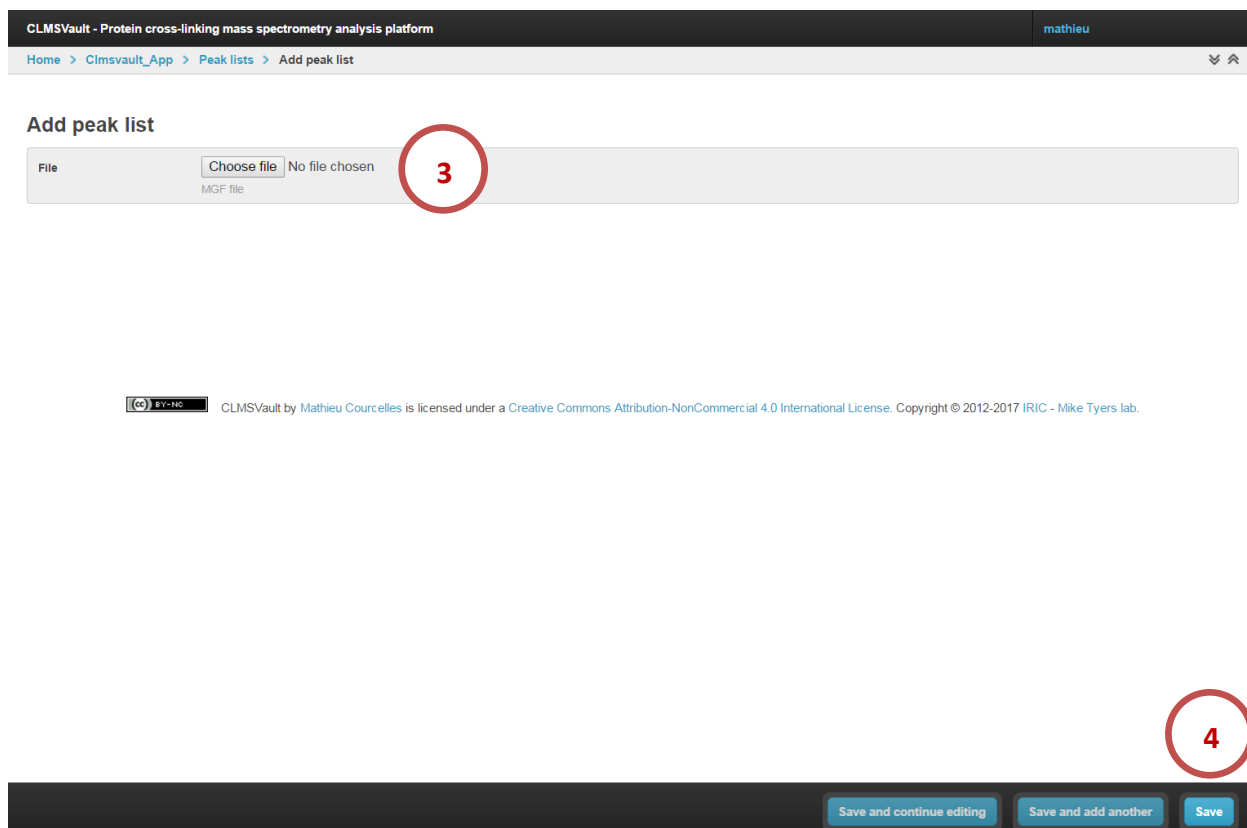

#### 4.4. PDB models

PDB models are imported into CLMSVault for 3D visualization of cross-links. The model can be imported automatically from RCSB Protein data bank with an identifier (refer to section 6.5). Custom in-house model can be imported with this procedure:

1. Click on “Import PDB model” from the main screen.

## Welcome to CLMSVault

CLMSVault is a web based software for storing, processing and visualizing protein cross-linking datasets. Please follow the workflow below to get started:

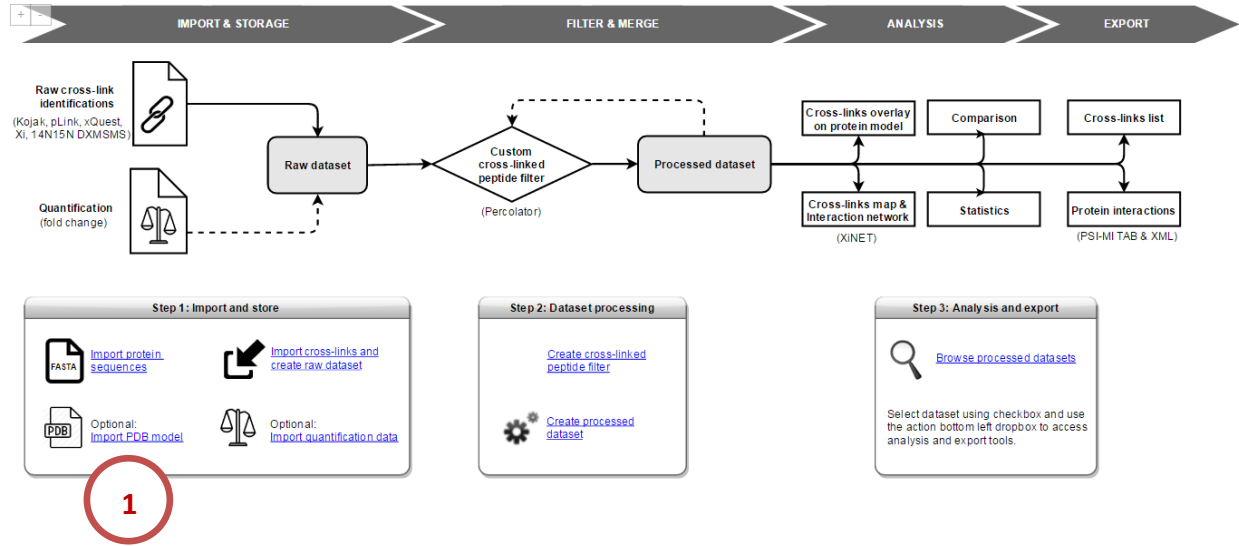

Quick links

Recent Actions

2. Fill the form and select your PDB file.

CLMSVault - Protein cross-linking mass spectrometry analysis platform demo

Home > Clmsvault\_App > Pdb > Add pdb

### Add pdb

|            |                                                                                              |          |
|------------|----------------------------------------------------------------------------------------------|----------|
| Identifier | <input type="text"/>                                                                         | <b>2</b> |
| Title      | <input type="text"/>                                                                         |          |
| File       | <input type="button" value="Choose file"/> No file chosen<br><small>Select PDB file.</small> |          |

 CLMSVault by Mathieu Courcelles is licensed under a Creative Commons Attribution-NonCommercial 4.0 International License. Copyright © 2012-2015 IRIC - Mike Tyers lab.

**3**

3. Click "Save".

#### 4.4. Quantification datasets

Quantification data can be linked to cross-linked peptide identification within CLMSVault for further filtering or visualization. Quantification data can be imported from a CSV file. There are two CSV file formats accepted. Those file formats must have one of the following headers and the respective data associated with it in each column:

1. "File", "ScanNumber", "FoldChange"
2. "CLPeptideId", "FoldChange"



The first format should allow import from most quantification software after reformatting the results. The second format allows direct linking to CLMSVault internal cross-link identifier (CLPeptideId). Those are obtained by exporting cross-links from CLMSVault before quantification. Two files named “CF\_quantfile\_test.csv” and “FSF\_quantfile\_test.csv” are available in the CLMSVault archive to demonstrate the format.

Import of quantification dataset is done with the following steps:

1. Click on “Import quantification data” from the main screen.

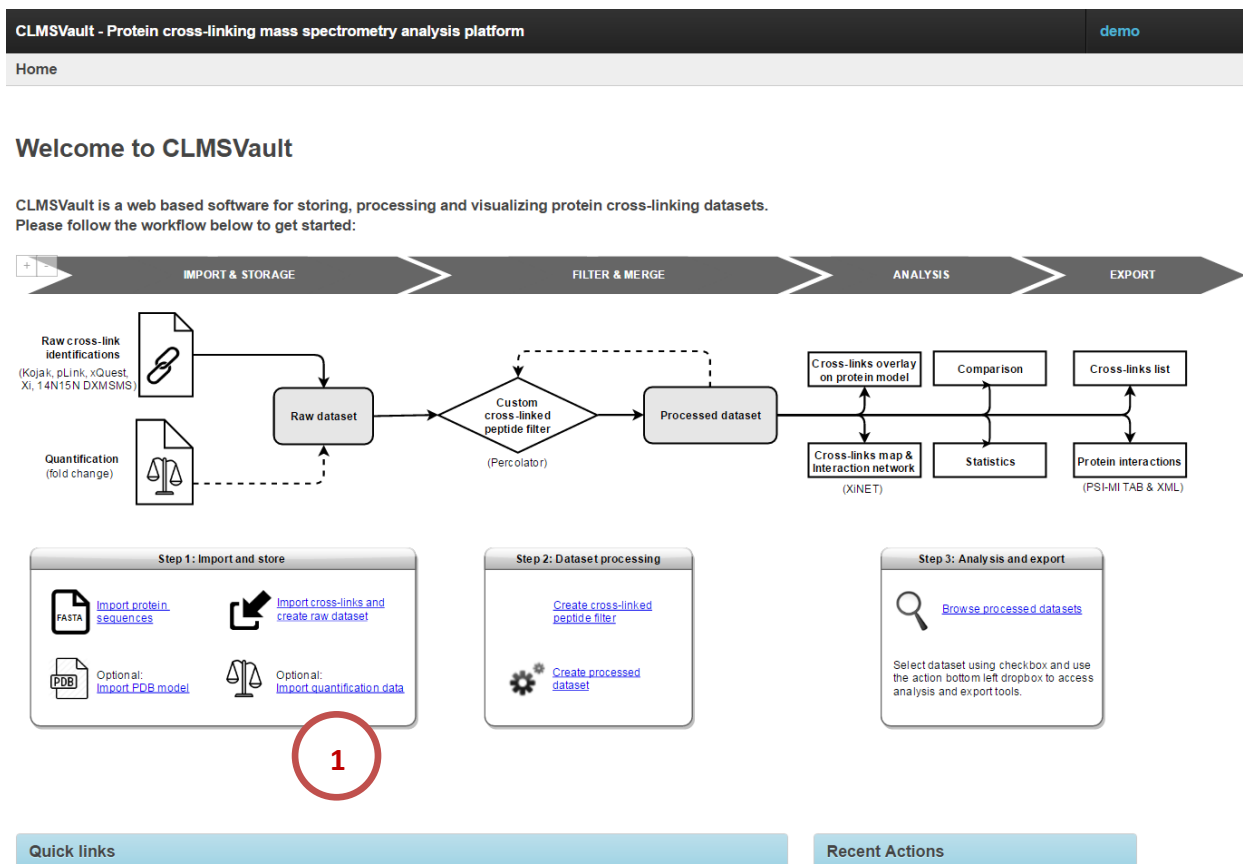

2. Fill the form.
3. Click “Save”.
4. Check parsing status.

### Add quantification

|                     |                                                                                          |
|---------------------|------------------------------------------------------------------------------------------|
| Name                | <input type="text"/>                                                                     |
| Quantification type | ----- v                                                                                  |
| File header         | ----- v                                                                                  |
| File                | <input type="button" value="Choose file"/> No file chosen<br>Select quantification file. |
| Parsing log         | (None)                                                                                   |
| Parsing status      | <input type="button" value="-"/>                                                         |

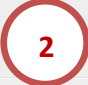

CLMSVault by Mathieu Courcelles is licensed under a Creative Commons Attribution-NonCommercial 4.0 International License. Copyright © 2012-2015 IRIC - Mike Tyers lab.

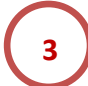

### Quantifications

1 total

| <input type="checkbox"/> | PK | Name          | Quantification type | File                                   | Parsing status                      | Creation date             |  |
|--------------------------|----|---------------|---------------------|----------------------------------------|-------------------------------------|---------------------------|--|
| <input type="checkbox"/> | 1  | Quant example | Fold change         | Quantification/1-CF_quantfile_test.csv | <input checked="" type="checkbox"/> | Sept. 25, 2015, 2:46 p.m. |  |

1 total

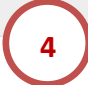

CLMSVault by Mathieu Courcelles is licensed under a Creative Commons Attribution-NonCommercial 4.0 International License. Copyright © 2012-2015 IRIC - Mike Tyers lab.

0 of 1 selected

## 5. Cross-link datasets filtering and merging

Cross-link datasets are presented in two forms in CLMSVault: raw and processed. A raw dataset is the list of all cross-linked peptides imported from the search engine into CLMSVault database (refer to section 4.2). A processed dataset is a subset of cross-linked peptides. It is created by applying various filters to a raw or processed dataset. It can also be created by merging multiple dataset from different experiments. Processed datasets are used for data analysis and visualization.

### 5.1. Filters

A filter in CLMSVault is a re-usable entity that is used to filter or exclude peptides from a dataset to create a processed dataset.

1. Click on “Create cross-linked peptide filter” from the main screen to expand the menu.

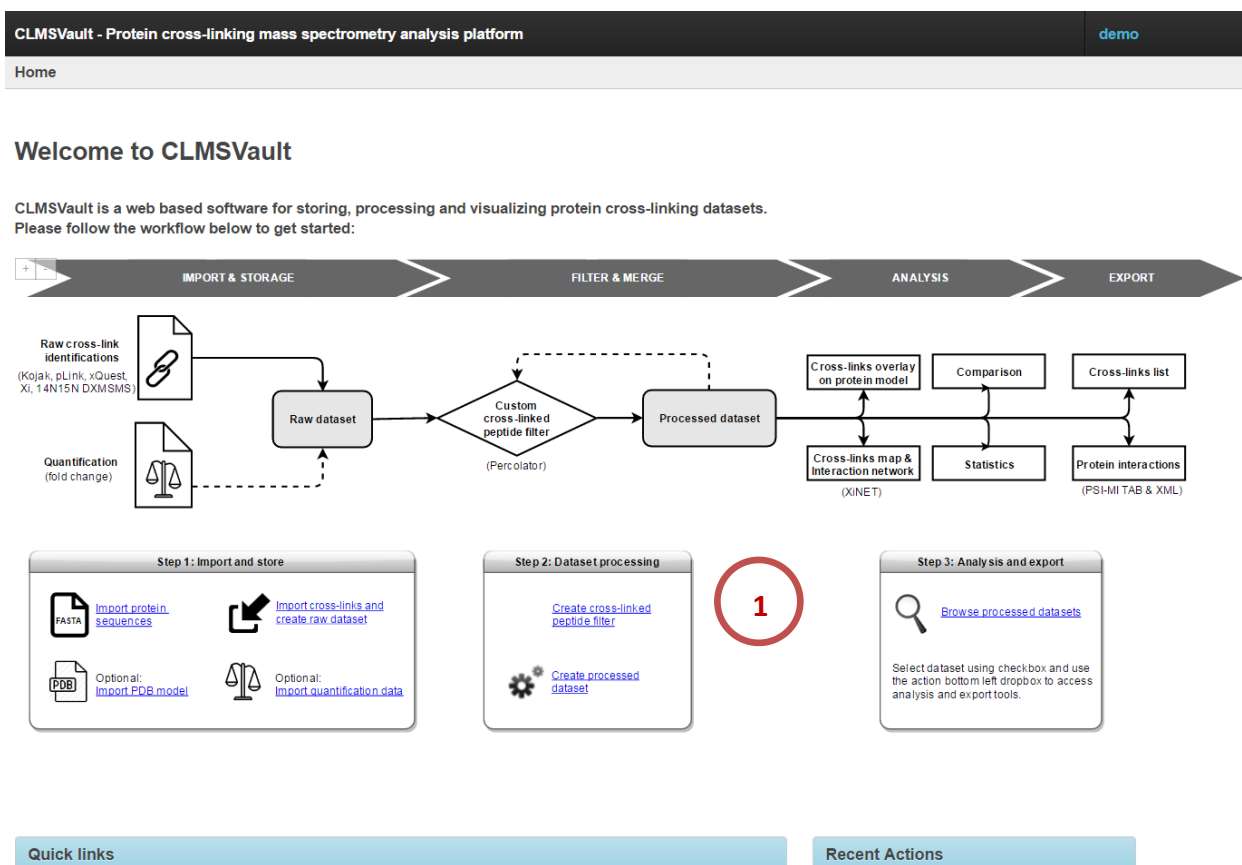

2. Fill the form. The form is divided into two parts. The first part has a global filter such as false positive cutoff, removal of decoys and unique cross-link. For unique cross-link, a key must be selected to specify unique definition. Unique can be applied per MS run file or dataset. This section also contains a filter for quantification. The bottom part specifies a filter for individual cross-link peptide.

CLMSVault - Protein cross-linking mass spectrometry analysis platform demo

Home > Clmsvault\_App > Cl peptide filters > Add cl peptide filter

### Add cl peptide filter

|                                                     |                                                                                         |
|-----------------------------------------------------|-----------------------------------------------------------------------------------------|
| Filter name                                         | <input type="text"/>                                                                    |
| Detailed description                                | <input type="text"/>                                                                    |
| False positive cutoff                               | <input type="text"/><br><small>Range from 0 to 1. Applied before unique filter.</small> |
| <input type="checkbox"/> Remove decoy hits          | <b>2</b>                                                                                |
| <input type="checkbox"/> Remove non K-K cross-links |                                                                                         |
| Unique/False positive peptide in                    | <input type="text"/>                                                                    |
| Unique peptide key                                  | <input type="text"/>                                                                    |
| Quantification experiment                           | <input type="text"/> +                                                                  |
| Quantification value 1                              | <input type="text"/>                                                                    |
| Quantification operator 1                           | <input type="text"/>                                                                    |
| Quantification logic                                | <input type="text"/>                                                                    |
| Quantification value 2                              | <input type="text"/>                                                                    |

**3**

3. Click "Save".

For example, the following filter will keep peptides with a mass error within 6 ppm, the length between 4-40 residues and with a score above 7.

| CI peptide filter params            |                 |                          |                |  | + |
|-------------------------------------|-----------------|--------------------------|----------------|--|---|
| Method                              | Field           | Field lookup             | Value          |  |   |
| Filter                              | error           | Less than or equal to    | 6              |  | × |
| Filter                              | error           | Greater than or equal to | -6             |  | × |
| Filter                              | peptide_wo_mod1 | Regular expression match | ^[A-Z]{4,40}\$ |  | × |
| Filter                              | peptide_wo_mod2 | Regular expression match | ^[A-Z]{4,40}\$ |  | × |
| Filter                              | match_score     | Greater than or equal to | 7              |  | × |
| -----                               | -----           | -----                    |                |  | - |
| -----                               | -----           | -----                    |                |  | - |
| Add another ci peptide filter param |                 |                          |                |  | + |

## 5.2. Creation of processed dataset

Once filters have been created, they can be applied to filter raw dataset to create a processed dataset. The filter can be applied iteratively to dataset until the desired list of cross-linked peptides is obtained.

1. Click on “Create processed dataset” from the main screen to expand the menu.

Home

## Welcome to CLMSVault

CLMSVault is a web based software for storing, processing and visualizing protein cross-linking datasets. Please follow the workflow below to get started:

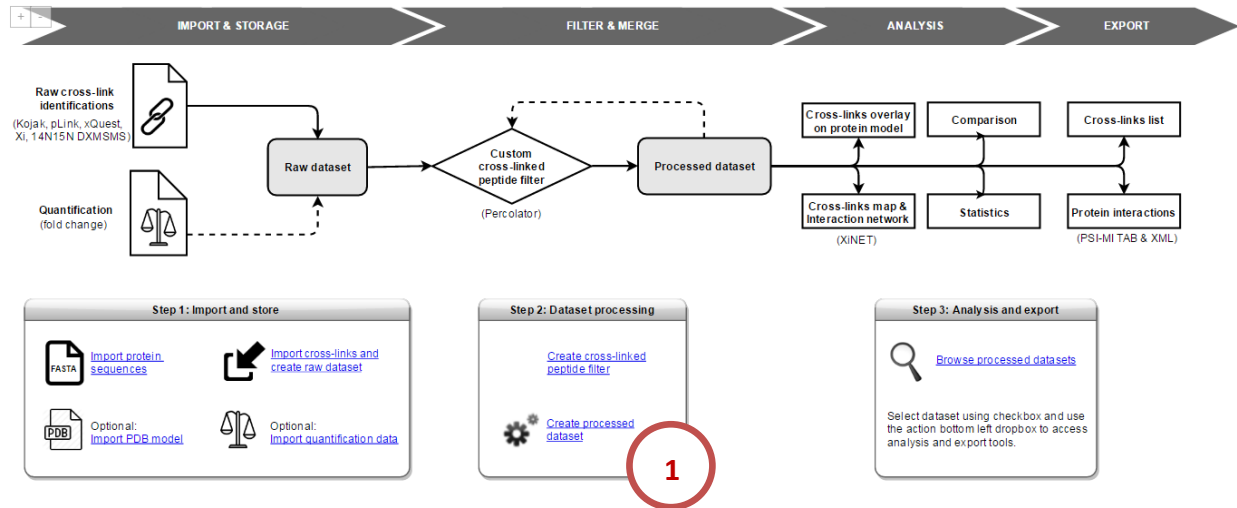

Quick links

Recent Actions

2. Select one or multiple datasets and the desired filter to apply.
3. Click "Save".

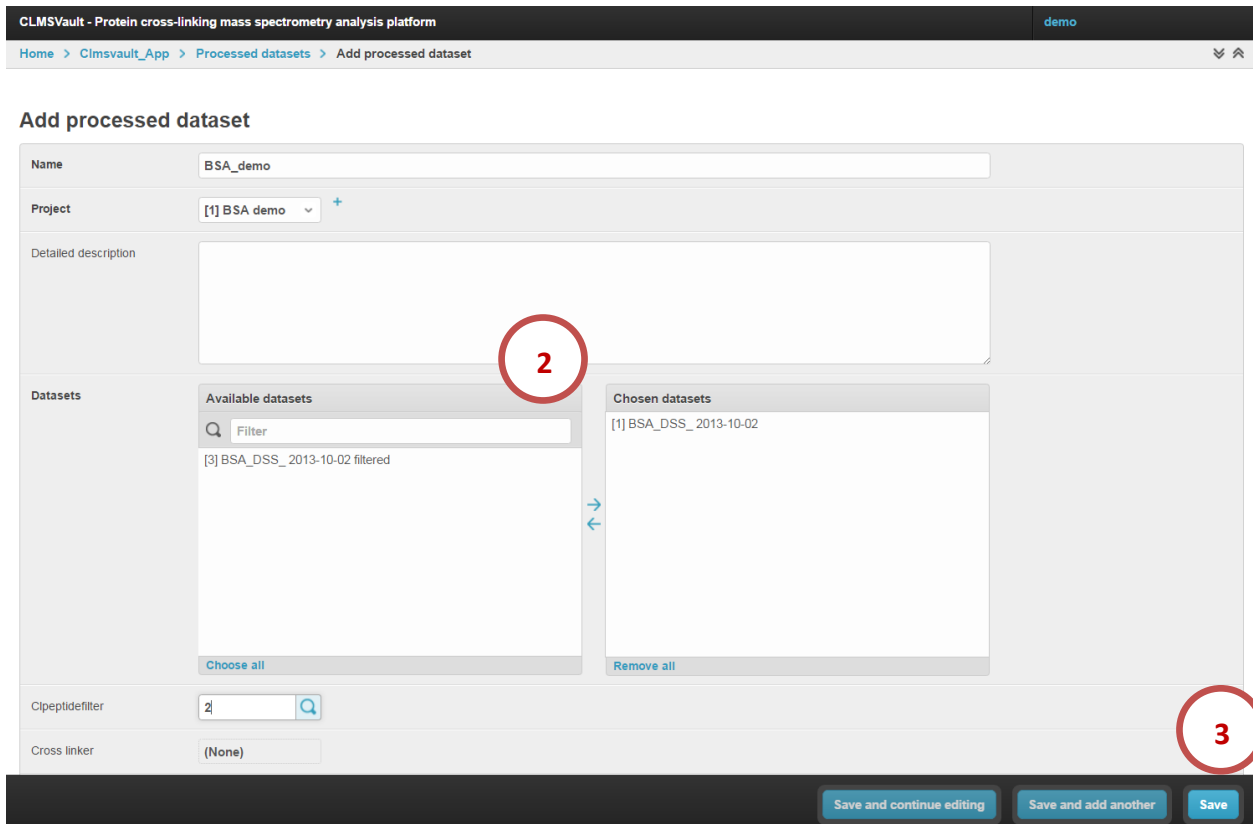

Refer to section 6 to analyze your processed dataset.

### 5.3. Creation of processed dataset with Percolator

Percolator can be used to create a processed dataset with a defined false discovery rate. Be sure that the dataset was searched with a target/decoy database.

1. Go to either “Raw datasets” or “Processed datasets” view from the main screen.

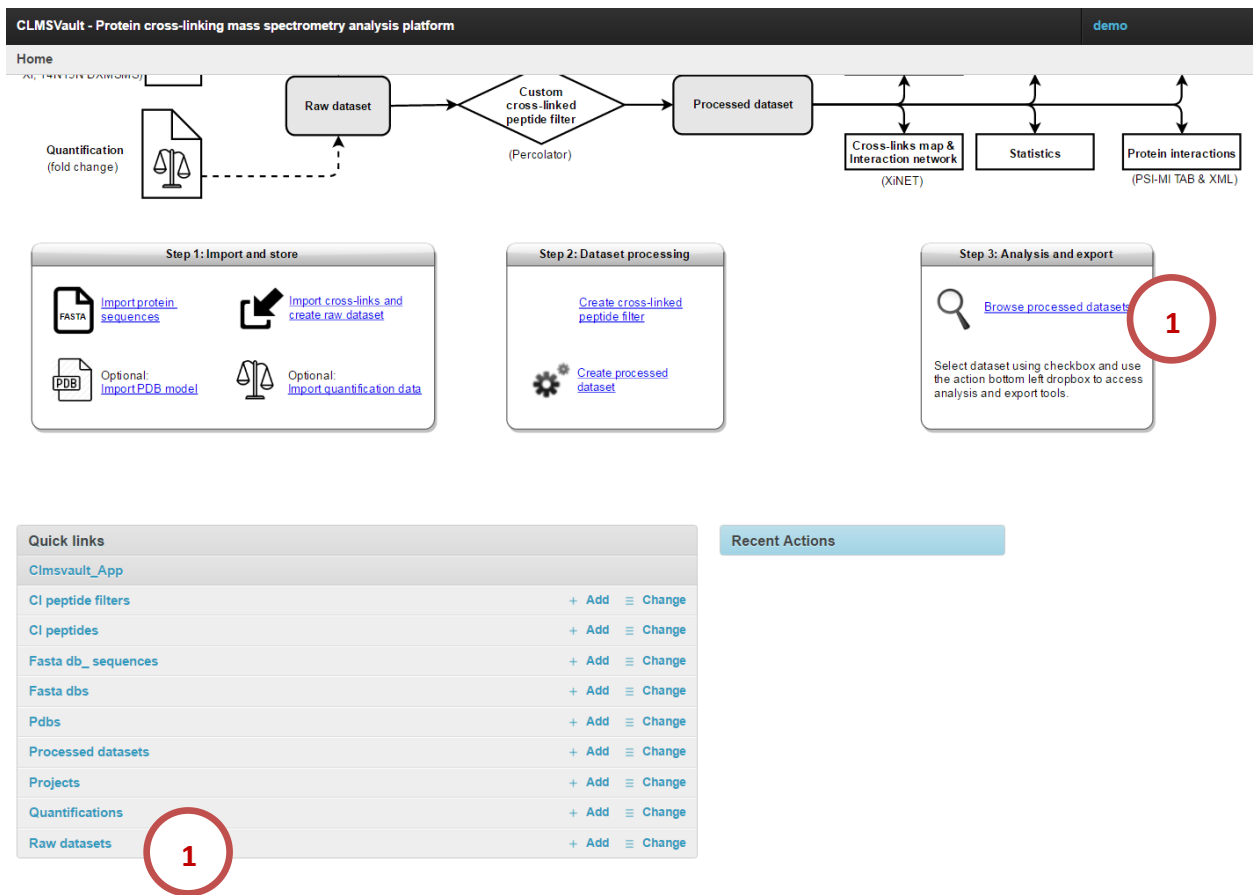

- Click on the checkbox to select the dataset that you want to process with Percolator.
- From the action menu, select "Run Percolator".



CLMSVault - Protein cross-linking mass spectrometry analysis platform demo

Home > Clmsvault\_App > Raw datasets

### Raw datasets Add raw dataset

1 total

< 2014 November 26

| <input checked="" type="checkbox"/> | Pk | Name               | Project      | File                                            | Cross linker | Fasta db | Search algorithm | Parsing status                       | Creation date            | CLPeptides |
|-------------------------------------|----|--------------------|--------------|-------------------------------------------------|--------------|----------|------------------|--------------------------------------|--------------------------|------------|
| <input checked="" type="checkbox"/> | 1  | BSA_DSS_2013-10-02 | [1] BSA demo | RawDataset/1-BSA_DSS_2013-10-02_score_gte_6.csv | DSS          | [1] BSA  | Xi               | <span style="color: green;">✔</span> | Nov. 26, 2014, 2:56 p.m. | See        |

1 total

CLMSVault by Mathieu Courcelles is licensed under a Creative Commons Attribution-NonCommercial 4.0 International License. Copyright © 2012-2015 IRIC - Mike Tyers lab.

- Delete selected raw datasets
- Export cross-linked peptides comparison to CSV
- Export dataset statistics to CSV
- Export as Interaction matrix
- Export as Percolator TSV
- Export as ProteoProfile CSV
- Export as PSI-MI TAB 2.5
- Export as PSI-MI XML 2.5
- Export as Xi CSV
- Export as Xi CSV with distance
- Run Percolator
- View in JSMol
- View in XINET

1 of 1 selected

4. Choose q-value threshold and cross-link type.

5. Click “Process”.

CLMSVault - Protein cross-linking mass spectrometry analysis platform demo

Home >

Select parameters for Percolator processing:

**Parameters**

q-value:   
Cross-linked peptides with q-value lower or equal than the specified value will be retained.

Cross-link type:

Normalize feature vector:

Process

6. Check the following report to see if any error occurred in Percolator. Your new processed dataset is listed at the bottom.

Percolator version 2.09, Build Date Apr 3 2015 09:42:26  
 Copyright (c) 2006-9 University of Washington. All rights reserved.  
 Written by Lukas Käll (lukall@u.washington.edu) in the  
 Department of Genome Sciences at the University of Washington.  
 Issued command:  
 /usr/bin/percolator -t 0.01 -F 0.01 -U /tmp/tmp0R98zY  
 Started Wed Jan 25 09:09:12 2017  
 Hyperparameters selectionFdr=0.01, Cpos=0, Cneg=0, maxNiter=10  
 Reading Tab delimited input from datafile /tmp/tmp0R98zY  
 Features:  
 Score dScore Charge Mass PPM LenShort LenLong LenSum  
 Train/test set contains 66 positives and 16 negatives, size ratio=4.125 and pi0=1  
 Warning : the number of negative samples read is too small to perform a correct classification.

selecting cpos by cross validation  
 selecting cneg by cross validation  
 Selected feature number 1 as initial search direction, could separate 7 positives in that direction  
 Selected feature number 7 as initial search direction, could separate 29 positives in that direction  
 Selected feature number 7 as initial search direction, could separate 10 positives in that direction  
 Estimating 24 over q=0.01 in initial direction  
 Reading in data and feature calculation took 0 cpu seconds or 0 seconds wall time  
 ---Training with Cpos selected by cross validation, Cneg selected by cross validation, fdr=0.01  
 Iteration 1 : After the iteration step, 39 target PSMs with q<0.01 were estimated by cross validation  
 Iteration 2 : After the iteration step, 44 target PSMs with q<0.01 were estimated by cross validation  
 Iteration 3 : After the iteration step, 45 target PSMs with q<0.01 were estimated by cross validation  
 Iteration 4 : After the iteration step, 45 target PSMs with q<0.01 were estimated by cross validation  
 Iteration 5 : After the iteration step, 45 target PSMs with q<0.01 were estimated by cross validation  
 Iteration 6 : After the iteration step, 45 target PSMs with q<0.01 were estimated by cross validation  
 Iteration 7 : After the iteration step, 45 target PSMs with q<0.01 were estimated by cross validation  
 Iteration 8 : After the iteration step, 45 target PSMs with q<0.01 were estimated by cross validation  
 Iteration 9 : After the iteration step, 45 target PSMs with q<0.01 were estimated by cross validation  
 Iteration 10 : After the iteration step, 45 target PSMs with q<0.01 were estimated by cross validation  
 Obtained weights (only showing weights of first cross validation set)  
 # first line contains normalized weights, second line the raw weights  
 Score dScore Charge Mass PPM LenShort LenLong LenSum m0  
 1.11 -0.5211 0.2377 -1.0643 -0.0420 1.4890 -0.9398 -0.3025 -0.6322  
 0.7519 -0.0000 0.2312 -0.0011 -0.0198 0.4555 -0.1174 -0.0344 -4.5409  
 After all training done, 29 target PSMs with q<0.0100 were found when measuring on the test set  
 Found 29 target PSMs scoring over 1.0000% FDR level on testset  
 Merging results from 3 datasets  
 Selecting pi\_0=0.4204  
 Calibrating statistics - calculating q values  
 New pi\_0 estimate on merged list gives 29 PSMs over q=0.0100  
 Calibrating statistics - calculating Posterior error probabilities (PEPs)  
 Processing took 0.22 cpu seconds or 1 seconds wall time

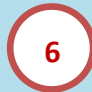

A new Processed dataset was created with Percolator results: [4] BSA\_DSS\_2013-10-02 filtered (percolated: q-value <=0.01, cl-type=IntraInter, nv=False)

Add processed dataset

## Processed datasets

| 2 total                  |      |                                                                                        |              |                                 |                                                                                 |          |                  |               |                          |                     |  |
|--------------------------|------|----------------------------------------------------------------------------------------|--------------|---------------------------------|---------------------------------------------------------------------------------|----------|------------------|---------------|--------------------------|---------------------|--|
| PK                       | Name | Project                                                                                | Datasets     | Filter                          | Cross linker                                                                    | Fasta db | Search algorithm | Creation date | CLPeptides               |                     |  |
| <input type="checkbox"/> | 4    | BSA_DSS_2013-10-02 filtered (percolated: q-value <=0.01, cl-type=IntraInter, nv=False) | [1] BSA demo | [3] BSA_DSS_2013-10-02 filtered |                                                                                 | DSS      | [1] BSA          | Xi            | Jan. 25, 2017, 9:09 a.m. | <a href="#">See</a> |  |
| <input type="checkbox"/> | 3    | BSA_DSS_2013-10-02 filtered                                                            | [1] BSA demo | [1] BSA_DSS_2013-10-02          | [2] Match score >= 7, Error: +6 ppm, Pep. Length: 4-40 a.a. Unique CL positions | DSS      | [1] BSA          | Xi            | Nov. 26, 2014, 3:32 p.m. | <a href="#">See</a> |  |

2 total

## 6. Analysis, visualization, and export

### 6.1. List, view, and delete

To list, view or delete any object stored in CLMSVault, use the following instructions. Here is an example for raw dataset object:

1. Click on “Quick links” from the main screen to expand the menu.
2. Click on “Raw datasets” to list of raw datasets stored in CLMSVault.

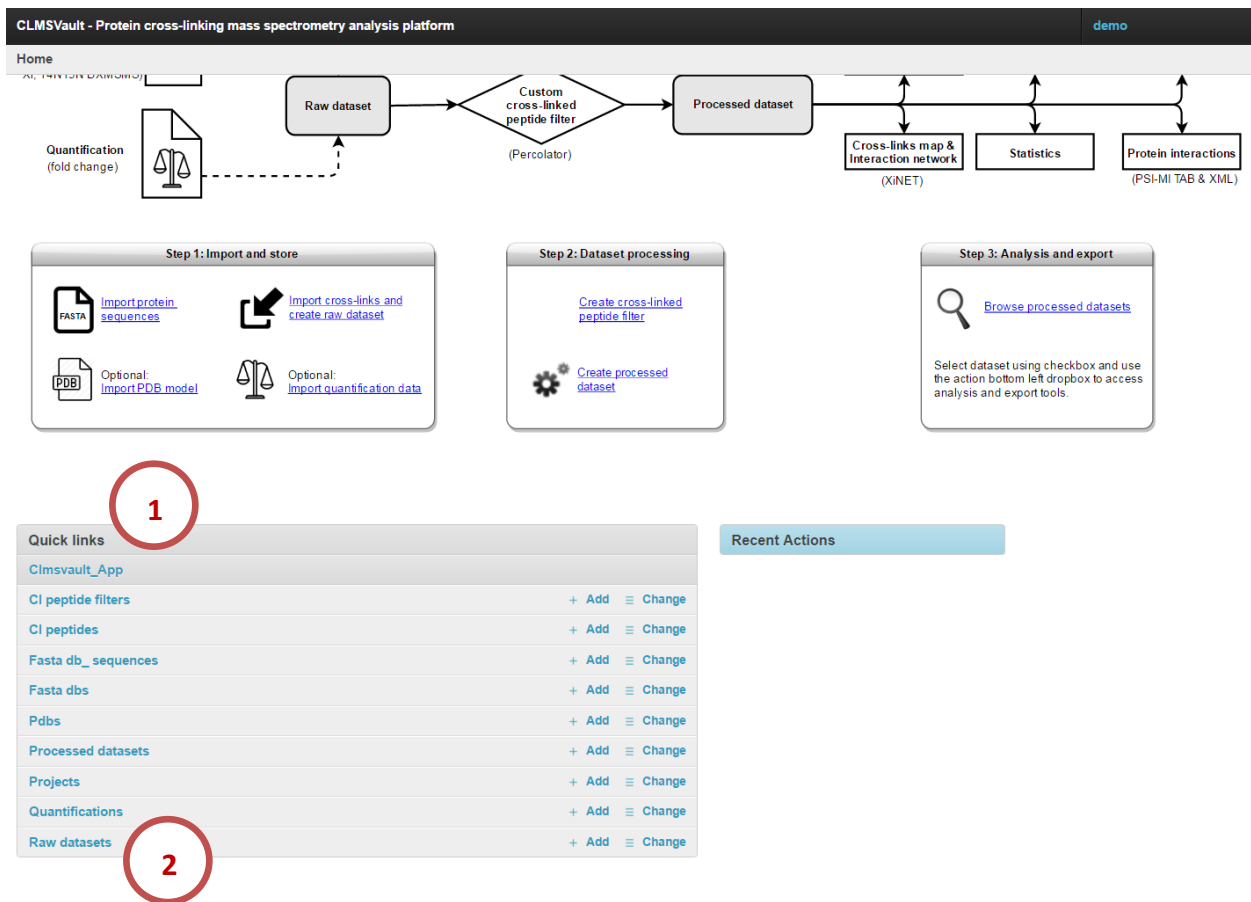

3. To view and edit raw dataset details, click on the dataset numeric identifier in the “Pk” column.

### Raw datasets

Add raw dataset

1 total

< 2014 November 26

| <input type="checkbox"/> | Pk | Name               | Project      | File                                            | Cross linker | Fasta db | Search algorithm | Parsing status | Creation date            | CLPeptides          |
|--------------------------|----|--------------------|--------------|-------------------------------------------------|--------------|----------|------------------|----------------|--------------------------|---------------------|
| <input type="checkbox"/> | 1  | BSA_DSS_2013-10-02 | [1] BSA demo | RawDataset/1-BSA_DSS_2013-10-02_score_gte_6.csv | DSS          | [1] BSA  | Xi               |                | Nov. 26, 2014, 2:56 p.m. | <a href="#">See</a> |

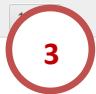

CLMSVault by Mathieu Courcelles is licensed under a Creative Commons Attribution-NonCommercial 4.0 International License. Copyright © 2012-2015 IRIC - Mike Tyers lab.

4. From the “Change” view, you can either:

- 4.1. Modify the raw dataset (modification of certain fields are restricted) and click “Save”.
- 4.2. Delete the raw dataset (deletion can be restricted for some object).

CLMSVault - Protein cross-linking mass spectrometry analysis platform demo

Home > Clmsvault\_App > Raw datasets > [1] BSA\_DSS\_2013-10-02

### Change raw dataset History

|                      |                                                                                                                                               |
|----------------------|-----------------------------------------------------------------------------------------------------------------------------------------------|
| Name                 | BSA_DSS_2013-10-02                                                                                                                            |
| Project              | [1] BSA demo + <b>4.1</b>                                                                                                                     |
| Instrument name      | Q-Exactive                                                                                                                                    |
| Fasta db             | [1] BSA +                                                                                                                                     |
| Detailed description | BSA dataset for CLMSVault demo.Filter: (match_score greaterThan 6)                                                                            |
| Parsing log          | Ok                                                                                                                                            |
| Parsing status       | ✓                                                                                                                                             |
| File                 | RawDataset/1-BSA_DSS_2013-10-02_score_gte_6.csv<br>pLink note: Merge the files ending with xlink_qry.proteins.txt from 1.samplesearch folder. |
| Extra file           | <br>pLink only: select pLink_combine.spectra.xls from 2.report/sample1 folder. This file is used to filter FDR filtered hits.                 |
| Search algorithm     | Xi <b>4.1</b>                                                                                                                                 |
| Cross linker         | DSS                                                                                                                                           |

**4.2** Delete Save and continue editing Save and add another Save

## 6.2. CL Peptides view

The “CL Peptides view” provides the list of all cross-linked peptides associated to a dataset.

1. To access it, click on “See” from the CL Peptides column in the raw or processed dataset view.

CLMSVault - Protein cross-linking mass spectrometry analysis platform demo

Home > Clmsvault\_App > Processed datasets

### Processed datasets Add processed dataset

2 total

2014 2017

| <input type="checkbox"/> | Pk | Name                                                                                    | Project      | Datasets                        | Filter                                                                          | Cross linker | Fasta db | Search algorithm | Creation date            | CLPeptides          |
|--------------------------|----|-----------------------------------------------------------------------------------------|--------------|---------------------------------|---------------------------------------------------------------------------------|--------------|----------|------------------|--------------------------|---------------------|
| <input type="checkbox"/> | 4  | BSA_DSS_2013-10-02 filtered (percolated: q-value <=0.01, cl-type=IntraInteer, nv=False) | [1] BSA demo | [3] BSA_DSS_2013-10-02 filtered |                                                                                 | DSS          | [1] BSA  | Xi               | Jan. 25, 2017, 9:09 a.m. | <a href="#">See</a> |
| <input type="checkbox"/> | 3  | BSA_DSS_2013-10-02 filtered                                                             | [1] BSA demo | [1] BSA_DSS_2013-10-02          | [2] Match score >= 7, Error: +6 ppm, Pep. Length: 4-40 a.a. Unique CL positions | DSS          | [1] BSA  | Xi               | Nov. 26, 2014, 3:32 p.m. | <a href="#">See</a> |

2 total

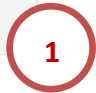

CLMSVault by Mathieu Courcelles is licensed under a Creative Commons Attribution-NonCommercial 4.0 International License. Copyright © 2012-2015 IRIC - Mike Tyers lab.

0 of 2 selected

2. The view provides details for the individual cross-linked peptide.

- 2.1. Each individual peptide can be viewed, edited or delete by clicking on their identifier in the “pk” column.
- 2.2. Keyword search is available to restrict the list of displayed peptides.
- 2.3. The filter drop-down menu allows further filtering with various categories.
- 2.4. The action drop-down menu allows to delete peptides or to run different analysis on a subset of peptides. Actions are applied on selected items.
  - 2.4.1. Check the boxes to select the subset of peptides
  - 2.4.2. If you want all peptides, you must click the top box
  - 2.4.3. Click “Select all” button at the bottom.
  - 2.4.4. Select your action



### 6.3. Spectrum viewer

MS/MS spectrum of cross-linked peptides can be viewed with the embedded Xi spectrum viewer MS/MS spectra file are imported into CLMSVault via MGF file which has been generated by msconvert tool from the Proteowizard. Refer to section 4.3 for spectra import.

1. From the “CL Peptides” screen, click on the icon in the “MSMS” column. This will show the spectrum in the interactive Xi spectrum viewer.

The screenshot shows the CLMSVault interface with a table of cross-linked peptides. A red circle highlights the 'MSMS' column header, and a red '1' is placed over the first icon in that column. The table lists various peptide sequences, scores, and link positions.

| PK    | MSMS | Run name                                               | Scan # | MS2     | Z | Score | Error (ppm) | Display protein1                            | Peptide1                             | Peptide1 | Peptide1 | Peptide2                                    | Peptide2       | Peptide2 | Peptide2 | Link type     | AV | ND |
|-------|------|--------------------------------------------------------|--------|---------|---|-------|-------------|---------------------------------------------|--------------------------------------|----------|----------|---------------------------------------------|----------------|----------|----------|---------------|----|----|
| 45979 | LM   | 2015-01-28-Part1_S10_Csk3 4; Ub_DSS_1mM_ACN_50pct_R3   | 10003  | 1099.58 | 3 | 15.18 | 0.13        | Ub Ubiquitin                                | AKIQDKEGPPDQGR                       | 28       | 2        | Ub Ubiquitin                                | LIFAGKLEDGR    | 43       | 6        | Intra-protein | ✓  | ✓  |
| 37665 | LM   | 2015-01-28-Part3_S05_Csk3 4; Ub_DSS_1mM_SL_1pct_R2     | 11599  | 1383.41 | 3 | 14.67 | 0.92        | Ub Ubiquitin                                | TLTGKITLEVPSDTIENWK                  | 7        | 5        | Ub Ubiquitin                                | AKIQDKEGPPDQGR | 28       | 2        | Intra-protein | ✓  | ✓  |
| 45993 | LM   | 2015-01-28-Part3_S10_Csk3 4; Ub_DSS_1mM_ACN_50pct_R3   | 11807  | 1264.34 | 3 | 14.54 | -0.01       | Ub Ubiquitin                                | TLSDYNIKRESTLHLVLR                   | 55       | 9        | Ub Ubiquitin                                | IQDKEGPPDQGR   | 30       | 4        | Intra-protein | ✓  | ✓  |
| 7454  | LM   | 2015-01-28-Part1_S10_Csk3 4; Ub_DSS_1mM_ACN_50pct_R1   | 10299  | 1099.58 | 3 | 13.90 | -0.02       | Ub Ubiquitin                                | AKIQDKEGPPDQGR                       | 28       | 2        | Ub Ubiquitin                                | LIFAGKLEDGR    | 43       | 6        | Intra-protein | ✓  | ✓  |
| 17492 | LM   | 2015-01-28-Part3_S05_Csk3 4; Ub_DSS_1mM_SL_1pct_R1     | 14594  | 1205.32 | 3 | 13.79 | 0.26        | Ub Ubiquitin                                | TLSDYNIKRESTLHLVLR                   | 55       | 9        | Ub Ubiquitin                                | LIFAGKLEDGR    | 43       | 6        | Intra-protein | ✓  | ✓  |
| 620   | LM   | 2015-01-28-Part3_S05_Csk3 4; Ub_DSS_1mM_ACN_1pct_R2    | 8831   | 752.11  | 3 | 13.50 | -0.24       | HIS-NC&347-184) HIS-NC&347-184) (29.33 kDa) | KQVLGTK                              | 183      | 1        | HIS-NC&347-184) HIS-NC&347-184) (29.33 kDa) | KQVLGTKVDAER   | 183      | 7        | Intra-protein | ✓  | ✓  |
| 7480  | LM   | 2015-01-28-Part1_S10_Csk3 4; Ub_DSS_1mM_ACN_50pct_R1   | 11299  | 798.83  | 5 | 13.45 | -0.53       | Ub Ubiquitin                                | TLSDYNIKRESTLHLVLR                   | 55       | 9        | Ub Ubiquitin                                | AKIQDKEGPPDQGR | 28       | 2        | Intra-protein | ✓  | ✓  |
| 636   | LM   | 2015-01-28-Part3_S05_Csk3 4; Ub_DSS_1mM_ACN_1pct_R3    | 13339  | 1097.93 | 3 | 13.03 | -0.63       | HIS-NC&347-184) HIS-NC&347-184) (29.33 kDa) | LKFPDYPYSPFAFR                       | 78       | 2        | HIS-NC&347-184) HIS-NC&347-184) (29.33 kDa) | KQVLGTKVDAER   | 183      | 7        | Intra-protein | ✓  | ✓  |
| 666   | LM   | 2015-01-28-Part3_S05_Csk3 4; Ub_DSS_1mM_ACN_1pct_R1    | 14432  | 1297.91 | 4 | 12.58 | -1.20       | HIS-NC&347-184) HIS-NC&347-184) (29.33 kDa) | FLTKMWHPIYETGVCCmISLHP PVQDPSGELPBER | 93       | 4        | HIS-NC&347-184) HIS-NC&347-184) (29.33 kDa) | KQVLGTK        | 183      | 1        | Intra-protein | ✓  | ✓  |
| 17671 | LM   | 2015-01-28-Part3_S10_Csk3 4; Ub_DSS_1mM_R1             | 11903  | 1317.03 | 3 | 12.53 | -0.06       | Ub Ubiquitin                                | TLTGKITLEVPSDTIENWK                  | 7        | 5        | Ub Ubiquitin                                | IQDKEGPPDQGR   | 30       | 4        | Intra-protein | ✓  | ✓  |
| 25334 | LM   | 2015-01-28-Part3_S14_Csk3 4; Ub_DSS_1mM_NaCl_1000mM_R2 | 8833   | 752.11  | 3 | 12.38 | 1.82        | HIS-NC&347-184) HIS-NC&347-184) (29.33 kDa) | KQVLGTK                              | 183      | 6        | HIS-NC&347-184) HIS-NC&347-184) (29.33 kDa) | KQVLGTKVDAER   | 183      | 7        | Intra-protein | ✓  | ✓  |
| 17726 | LM   | 2015-01-28-Part3_S05_Csk3                              | 11909  | 835.61  | 3 | 12.13 | -0.40       | Ub Ubiquitin                                | AKIQDKEGPPDQGR                       | 28       | 2        | Ub Ubiquitin                                | MSYFYK         | 1        | 1        | Intra-protein | ✓  | ✓  |

2. Spectrum can be exported to SVG file.



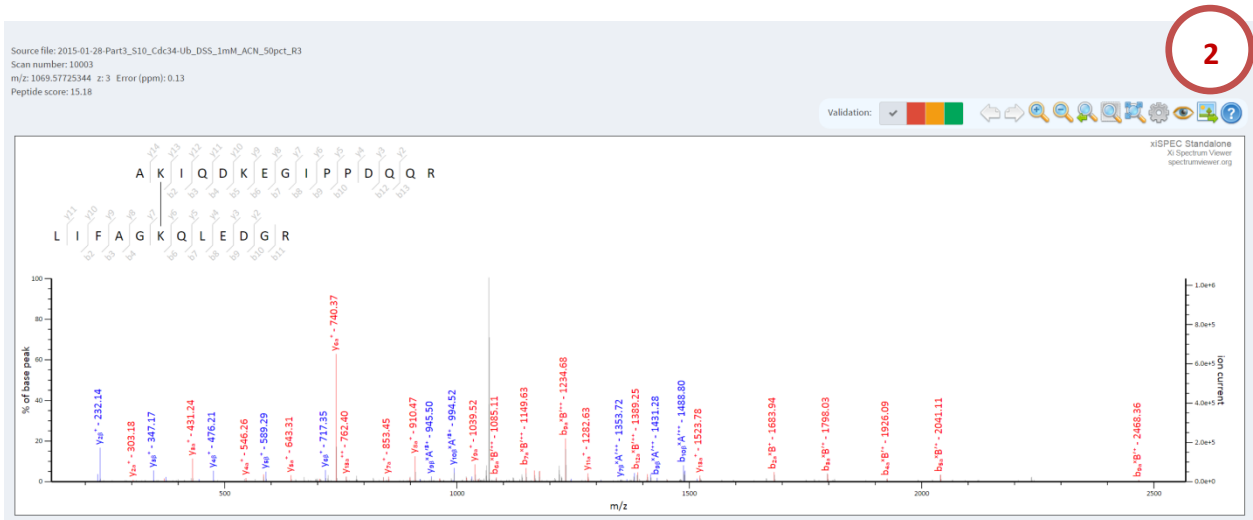

2

## 6.4. View in XiNET

XiNET displays cross-link map of intra or inter-protein cross-links. This action is accessed from either the “CL Peptides” or the “Dataset” views after selecting the desired objects.

3. Select the desired parameters.

1.1. By default, XiNET colors cross-link by their cross-link type (inter, intra, dead-end). In CLMSVault, you can also color cross-links by their peptide score or by fold-change.

4. Click “View”.

CLMSVault - Protein cross-linking mass spectrometry analysis platform demo

[Home >](#)

Select cross-links color scheme for xiNET:

**Display** 1.1.

Color scheme:

---

**Color Gradient Limit**

Min score:   
Minimum score used for quantification color gradient.

Max score:   
Maximum score used for quantification color gradient.

---

**Quantification**

Quantification:

Fold change limit:   
Optional absolute value. Absolute maximum value used otherwise.

Hide not quantified:

1 2 View

5. Interact with the XiNET to visualize cross-linked regions.

Help
Export Graphic
Auto Layout
Reset Zoom
7.01 
Cut-Off: 7.01
Self-links

Ambiguous 
Peptide score: [0.0, 15.0]

3

Serum albumin [1], residue 225 to Serum albumin [1], residue 462

1 match: Show Less ▼

| Score  | Auto | Pep Seq.1              | Link Pos.1 | Pep Seq.2 | Link Pos.2 |
|--------|------|------------------------|------------|-----------|------------|
| 7.3208 | true | CCTKPESERPCTEDYLSLILNR | 3          | LRCASIQK  | 5          |

## 6.5. View in JSMol

Identified cross-links can be displayed on PDB model to visualize their spatial distribution. This action is accessed from either the “CL Peptides” or the “Dataset” views after selecting the desired objects.

1. Select the desired parameters.

- 1.1. PDB selection: Select PDB file stored in CLMSVault or enter PDB identifier to automatically retrieve it from RCSB Protein Data bank.

- 1.1.1. For each protein, a link is provided to run a protein Blast to query identifiers of available PDB models.

- 1.2. Display: JMol and JSMol viewers are available to display the model. JMol requires Java installed. Rendering speed can differ between the two viewers.

- 1.3. Alignment threshold: CLMSVault uses sequence alignments to match and align protein sequences used for cross-links identification and protein sequences in the PDB model. The alignment is also used to position the cross-linked peptides in the model. Protein and peptide thresholds are thus used to control this. These parameters allow matching protein and peptides in a model with residues substitution and sequence gap. It should also allow mapping to homologous protein model.

- 1.4. Random distribution: CLMSVault plots distribution of inter-residues cross-link distances. It also computes random distance distributions to evaluate if cross-links are random hits for this model. To compute this distribution, the user must specify which residues can be cross-linked.

2. Click “View”.

The screenshot shows a web interface for PDB selection and display. It is divided into several sections:

- PDB selection:** Contains a text input for 'Pdb identifier' with a placeholder 'Enter PDB identifier or use BLAST feature below to get a suggestion.' and a dropdown for 'Pdb select'. A red circle labeled '1.1' is around the BLAST text.
- Display:** Contains a dropdown for 'Viewer' (set to 'JMol') and a dropdown for 'Color scheme' (set to 'default'). A red circle labeled '1' is around the 'Viewer' dropdown, and another labeled '1.2' is around the 'JMol' text.
- Alignment threshold:** Contains two text inputs for 'Protein identity' and 'Peptide identity', both set to '0.7'. A red circle labeled '1.3' is around the '0.7' text in the 'Protein identity' field.
- Random distribution:** Contains a dropdown for 'Cross linked residues' (set to 'Cross-linked residues'). A red circle labeled '1.4' is around the 'Cross-linked residues' text.
- Quantification:** An empty section.
- Color Gradient Limit:** A section with a blue 'View' button. A red circle labeled '2' is around the 'View' button.
- BLAST protein sequence against PDB:** A section with the text 'BLAST protein sequence against PDB' and 'P02769'. A red circle labeled '1.1.' is around the 'P02769' text.

3. The next view presents the 3D viewer. It is separated into four parts:

3.1. JSMol/JMol viewer:

Left-click allows rotating the molecule and the right-click displays the menu to access all functionalities provided by JSMol/JMol viewer. Check boxes are provided to toggle the display of chain.

3.2. Cross-linked peptides list:

This part list for each cross-link, the mapping of cross-linked residues between your identifications and the PDB model. Cross-linked residues can be labeled and highlighted in red by clicking the label in the PDB residue columns. Cross-link inter-residue distance is reported in the "Distance" column. PI columns report the peptide identity value between the sequence from the MS/MS search and the PDB model. "S/H" checkbox toggles the display of the cross-links on the viewer. At the bottom of this section, there is also a color gradient for displayed cross-links for either peptide score or quantification values. There are also some controls to automatically display cross-links with a length lower than a specified threshold. Additional controls are provided to control JSMol/JMol image quality and rendering speed.

### 3.3. Cross-link inter-residues distance distributions:

Four cross-link inter-residue distance distributions are plotted:

- **All:** all possible cross-links
- **Minimum:** In the case where cross-links are mapped multiple in the model (e.g. dimer), it will keep only the distance with the minimum value.
- **Random:** Random distribution based on user-selected definition (see 6.4-1.4) and the size of cross-link list.
- **Selected:** Distribution of user selected cross-links.

A Mann-Whitney rank test is done to indicate if the identified cross-link distance distribution differs from thousand random distributions.

### 3.4. Sequence alignments:

This section displays protein sequences alignments and indicates which protein sequences have been paired between the MS/MS sequences and the PDB model.

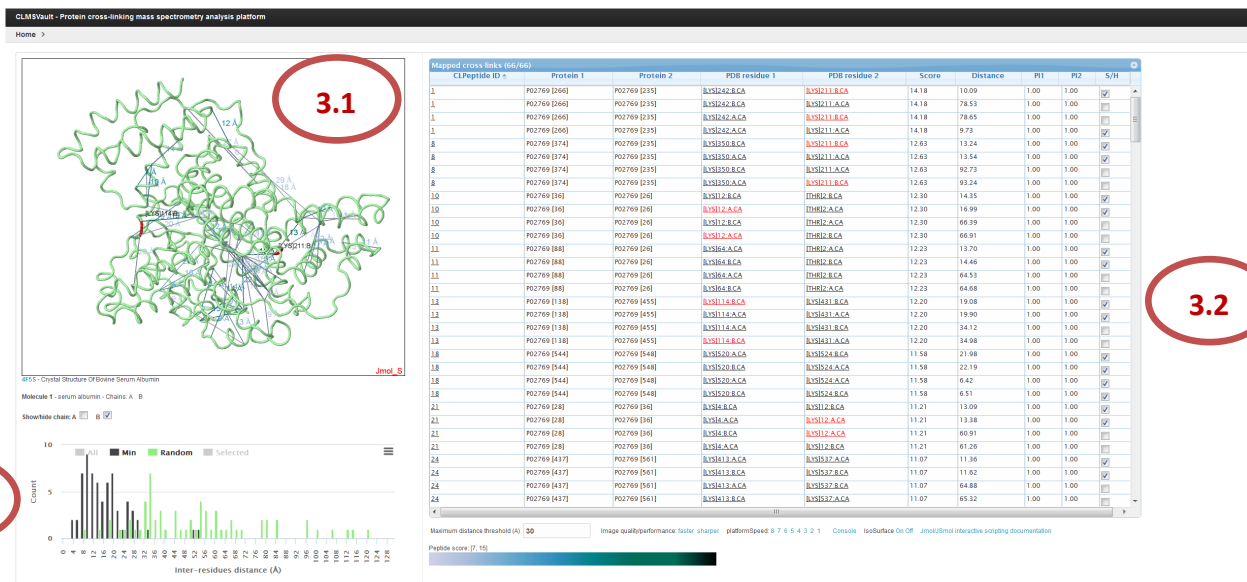

Mann-Whitney rank test

Two-sided p-value for 1000 draw of sample with size of 66

p-value <= 0.0e-11

A small p-value indicates that the observed cross-links distance distribution differs from a random selection distribution. Please select the appropriate random distribution for your cross-linker in the previous page.

Alignments

```
P02769 - Chain A
MSPTFTEILLSPKAVRQVFRADYRREIARHFFELCLDEENRFDVLLAFQVLLQQVDFDENTKLVNLELDFAKVQYADSRHAGDCEKASLHTLFDQELQYASLRETVQHMADQCEKGEFENRQFLAHKDGQPLPFLAFCQPTVLCDEFFADEKFNQVLYEIAARRPFFYAFPELLYANKYHWYFQEQDQAEKGLLPEITENREKYLARAGQLSCATQFQESALRANHTASLQGFPPFAEFTY
-----DTRERSEIARHFFELCLDEENRFDVLLAFQVLLQQVDFDENTKLVNLELDFAKVQYADSRHAGDCEKASLHTLFDQELQYASLRETVQHMADQCEKGEFENRQFLAHKDGQPLPFLAFCQPTVLCDEFFADEKFNQVLYEIAARRPFFYAFPELLYANKYHWYFQEQDQAEKGLLPEITENREKYLARAGQLSCATQFQESALRANHTASLQGFPPFAEFTY
Protein Identity: 0.998

P02769 - Chain B
MSPTFTEILLSPKAVRQVFRADYRREIARHFFELCLDEENRFDVLLAFQVLLQQVDFDENTKLVNLELDFAKVQYADSRHAGDCEKASLHTLFDQELQYASLRETVQHMADQCEKGEFENRQFLAHKDGQPLPFLAFCQPTVLCDEFFADEKFNQVLYEIAARRPFFYAFPELLYANKYHWYFQEQDQAEKGLLPEITENREKYLARAGQLSCATQFQESALRANHTASLQGFPPFAEFTY
-----DTRERSEIARHFFELCLDEENRFDVLLAFQVLLQQVDFDENTKLVNLELDFAKVQYADSRHAGDCEKASLHTLFDQELQYASLRETVQHMADQCEKGEFENRQFLAHKDGQPLPFLAFCQPTVLCDEFFADEKFNQVLYEIAARRPFFYAFPELLYANKYHWYFQEQDQAEKGLLPEITENREKYLARAGQLSCATQFQESALRANHTASLQGFPPFAEFTY
Protein Identity: 0.998
```

3.4

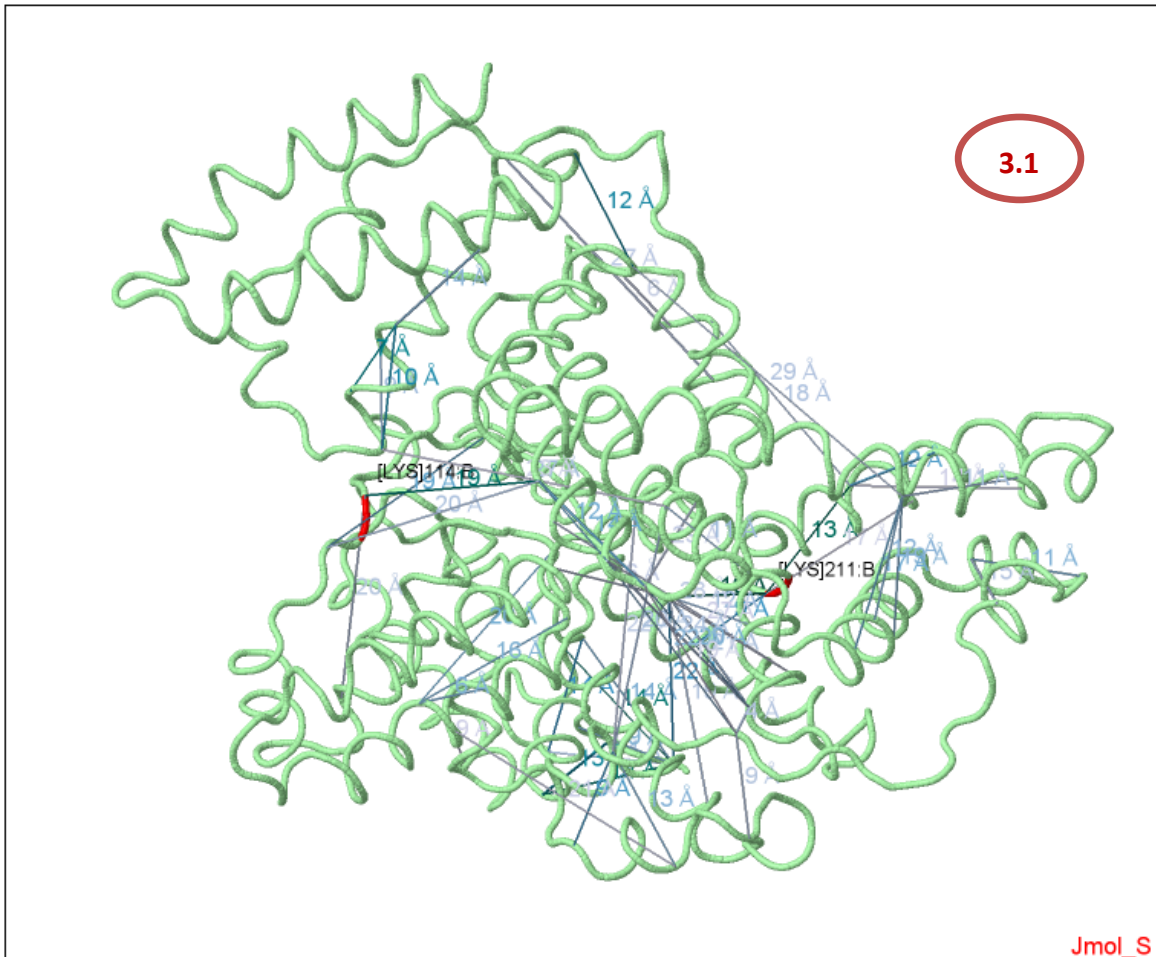

3.1

4F5S - Crystal Structure Of Bovine Serum Albumin

Molecule 1 - serum albumin - Chains: A B

Show/hide chain: A  B

### 3.2

Mapped cross-links (66/66)

| CLPeptide ID | Protein 1    | Protein 2    | PDB residue 1                 | PDB residue 2                 | Score | Distance | PI1  | PI2  | S/H                                 |
|--------------|--------------|--------------|-------------------------------|-------------------------------|-------|----------|------|------|-------------------------------------|
| 1            | P02769 [266] | P02769 [235] | <a href="#">[LYS]242-B.CA</a> | <a href="#">[LYS]211-B.CA</a> | 14.18 | 10.09    | 1.00 | 1.00 | <input checked="" type="checkbox"/> |
| 1            | P02769 [266] | P02769 [235] | <a href="#">[LYS]242-B.CA</a> | <a href="#">[LYS]211-A.CA</a> | 14.18 | 78.53    | 1.00 | 1.00 | <input type="checkbox"/>            |
| 1            | P02769 [266] | P02769 [235] | <a href="#">[LYS]242-A.CA</a> | <a href="#">[LYS]211-B.CA</a> | 14.18 | 78.65    | 1.00 | 1.00 | <input type="checkbox"/>            |
| 1            | P02769 [266] | P02769 [235] | <a href="#">[LYS]242-A.CA</a> | <a href="#">[LYS]211-A.CA</a> | 14.18 | 9.73     | 1.00 | 1.00 | <input checked="" type="checkbox"/> |
| 8            | P02769 [374] | P02769 [235] | <a href="#">[LYS]350-B.CA</a> | <a href="#">[LYS]211-B.CA</a> | 12.63 | 13.24    | 1.00 | 1.00 | <input checked="" type="checkbox"/> |
| 8            | P02769 [374] | P02769 [235] | <a href="#">[LYS]350-A.CA</a> | <a href="#">[LYS]211-A.CA</a> | 12.63 | 13.54    | 1.00 | 1.00 | <input checked="" type="checkbox"/> |
| 8            | P02769 [374] | P02769 [235] | <a href="#">[LYS]350-B.CA</a> | <a href="#">[LYS]211-A.CA</a> | 12.63 | 92.73    | 1.00 | 1.00 | <input type="checkbox"/>            |
| 8            | P02769 [374] | P02769 [235] | <a href="#">[LYS]350-A.CA</a> | <a href="#">[LYS]211-B.CA</a> | 12.63 | 93.24    | 1.00 | 1.00 | <input type="checkbox"/>            |
| 10           | P02769 [36]  | P02769 [26]  | <a href="#">[LYS]12-B.CA</a>  | <a href="#">[THR]2-B.CA</a>   | 12.30 | 14.35    | 1.00 | 1.00 | <input checked="" type="checkbox"/> |
| 10           | P02769 [36]  | P02769 [26]  | <a href="#">[LYS]12-A.CA</a>  | <a href="#">[THR]2-A.CA</a>   | 12.30 | 16.99    | 1.00 | 1.00 | <input checked="" type="checkbox"/> |
| 10           | P02769 [36]  | P02769 [26]  | <a href="#">[LYS]12-B.CA</a>  | <a href="#">[THR]2-A.CA</a>   | 12.30 | 66.39    | 1.00 | 1.00 | <input type="checkbox"/>            |
| 10           | P02769 [36]  | P02769 [26]  | <a href="#">[LYS]12-A.CA</a>  | <a href="#">[THR]2-B.CA</a>   | 12.30 | 66.91    | 1.00 | 1.00 | <input type="checkbox"/>            |
| 11           | P02769 [88]  | P02769 [26]  | <a href="#">[LYS]64-A.CA</a>  | <a href="#">[THR]2-A.CA</a>   | 12.23 | 13.70    | 1.00 | 1.00 | <input checked="" type="checkbox"/> |
| 11           | P02769 [88]  | P02769 [26]  | <a href="#">[LYS]64-B.CA</a>  | <a href="#">[THR]2-B.CA</a>   | 12.23 | 14.46    | 1.00 | 1.00 | <input checked="" type="checkbox"/> |
| 11           | P02769 [88]  | P02769 [26]  | <a href="#">[LYS]64-A.CA</a>  | <a href="#">[THR]2-B.CA</a>   | 12.23 | 64.53    | 1.00 | 1.00 | <input type="checkbox"/>            |
| 11           | P02769 [88]  | P02769 [26]  | <a href="#">[LYS]64-B.CA</a>  | <a href="#">[THR]2-A.CA</a>   | 12.23 | 64.68    | 1.00 | 1.00 | <input type="checkbox"/>            |
| 13           | P02769 [138] | P02769 [455] | <a href="#">[LYS]114-B.CA</a> | <a href="#">[LYS]431-B.CA</a> | 12.20 | 19.08    | 1.00 | 1.00 | <input checked="" type="checkbox"/> |
| 13           | P02769 [138] | P02769 [455] | <a href="#">[LYS]114-A.CA</a> | <a href="#">[LYS]431-A.CA</a> | 12.20 | 19.90    | 1.00 | 1.00 | <input checked="" type="checkbox"/> |
| 13           | P02769 [138] | P02769 [455] | <a href="#">[LYS]114-A.CA</a> | <a href="#">[LYS]431-B.CA</a> | 12.20 | 34.12    | 1.00 | 1.00 | <input type="checkbox"/>            |
| 13           | P02769 [138] | P02769 [455] | <a href="#">[LYS]114-B.CA</a> | <a href="#">[LYS]431-A.CA</a> | 12.20 | 34.98    | 1.00 | 1.00 | <input type="checkbox"/>            |
| 18           | P02769 [544] | P02769 [548] | <a href="#">[LYS]520-A.CA</a> | <a href="#">[LYS]524-B.CA</a> | 11.58 | 21.98    | 1.00 | 1.00 | <input checked="" type="checkbox"/> |
| 18           | P02769 [544] | P02769 [548] | <a href="#">[LYS]520-B.CA</a> | <a href="#">[LYS]524-A.CA</a> | 11.58 | 22.19    | 1.00 | 1.00 | <input checked="" type="checkbox"/> |
| 18           | P02769 [544] | P02769 [548] | <a href="#">[LYS]520-A.CA</a> | <a href="#">[LYS]524-A.CA</a> | 11.58 | 6.42     | 1.00 | 1.00 | <input checked="" type="checkbox"/> |
| 18           | P02769 [544] | P02769 [548] | <a href="#">[LYS]520-B.CA</a> | <a href="#">[LYS]524-B.CA</a> | 11.58 | 6.51     | 1.00 | 1.00 | <input checked="" type="checkbox"/> |
| 21           | P02769 [28]  | P02769 [36]  | <a href="#">[LYS]4-A.CA</a>   | <a href="#">[LYS]12-B.CA</a>  | 11.21 | 13.09    | 1.00 | 1.00 | <input checked="" type="checkbox"/> |
| 21           | P02769 [28]  | P02769 [36]  | <a href="#">[LYS]4-A.CA</a>   | <a href="#">[LYS]12-A.CA</a>  | 11.21 | 13.38    | 1.00 | 1.00 | <input checked="" type="checkbox"/> |
| 21           | P02769 [28]  | P02769 [36]  | <a href="#">[LYS]4-B.CA</a>   | <a href="#">[LYS]12-A.CA</a>  | 11.21 | 60.91    | 1.00 | 1.00 | <input type="checkbox"/>            |
| 21           | P02769 [28]  | P02769 [36]  | <a href="#">[LYS]4-A.CA</a>   | <a href="#">[LYS]12-B.CA</a>  | 11.21 | 61.26    | 1.00 | 1.00 | <input type="checkbox"/>            |
| 24           | P02769 [437] | P02769 [561] | <a href="#">[LYS]413-A.CA</a> | <a href="#">[LYS]537-A.CA</a> | 11.07 | 11.36    | 1.00 | 1.00 | <input checked="" type="checkbox"/> |
| 24           | P02769 [437] | P02769 [561] | <a href="#">[LYS]413-B.CA</a> | <a href="#">[LYS]537-B.CA</a> | 11.07 | 11.62    | 1.00 | 1.00 | <input checked="" type="checkbox"/> |
| 24           | P02769 [437] | P02769 [561] | <a href="#">[LYS]413-A.CA</a> | <a href="#">[LYS]537-B.CA</a> | 11.07 | 64.88    | 1.00 | 1.00 | <input type="checkbox"/>            |
| 24           | P02769 [437] | P02769 [561] | <a href="#">[LYS]413-B.CA</a> | <a href="#">[LYS]537-A.CA</a> | 11.07 | 65.32    | 1.00 | 1.00 | <input type="checkbox"/>            |

Maximum distance threshold (Å)

Image quality/performance: [faster](#) [sharper](#) platformSpeed: 8 7 6 5 4 3 2 1 [Console](#) IsoSurface On Off [Jmol/JSmol interactive scripting documentation](#)

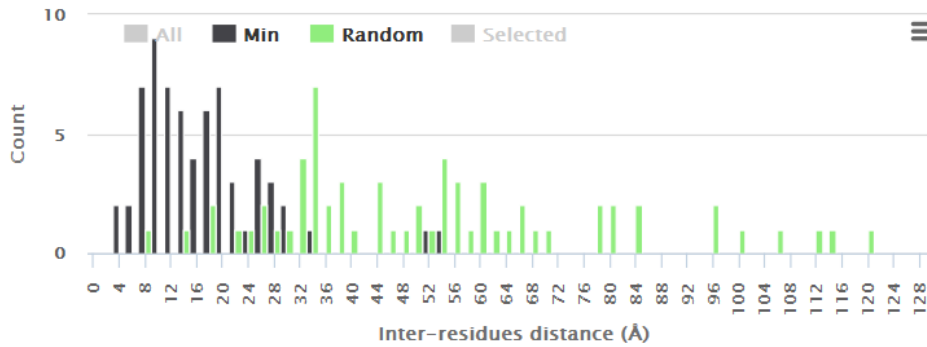

### 3.3

#### Mann-Whitney rank test

Two-sided p-value for 1000 draw of sample with size of 66.

p-value <= 6.8e-11

A small p-value indicates that the observed cross-links distance distribution differs from a random selection distribution. Please select the appropriate random distribution for your cross-linker in the previous page.

## 6.6. Export dataset statistics to CSV

This action is accessed from the “Dataset” views after selecting the datasets. It generates a CSV file with statistics of cross-link datasets. Note that redundancy must be filtered prior using statistics if required.

The CSV file contains the following columns:

| Column name                   | Description                                                                  |
|-------------------------------|------------------------------------------------------------------------------|
| Dataset                       | Name of the dataset                                                          |
| Run                           | Name of MS file                                                              |
| PSM                           | Number of peptide-spectrum matches                                           |
| Inter-protein                 | Number of inter-protein cross-links                                          |
| Inter-protein(NoDimerNoDecoy) | Number of inter-protein cross-links without cross-link from the same protein |
| Intra-protein                 | Number of intra-protein cross-links                                          |
| Intra-peptide                 | Number of intra-peptide cross-links                                          |
| Dead-end                      | Number of dead-end peptides                                                  |
| Linear peptide                | Number of linear peptides                                                    |
| Min. match score              | Minimum peptide score                                                        |
| Average match score           | Average peptide score                                                        |
| Max. match score              | Maximum peptide score                                                        |
| Autovalidated                 | Number of auto validated cross-links (Xi only)                               |
| Decoy                         | Number of decoy matches                                                      |
| False positive ratio          | Decoy matches divided by total matches                                       |
| z1-9                          | Number of peptides per charge state                                          |

## 6.7. Export cross-linked peptides comparison to CSV

This action is accessed from the “Dataset” views after selecting the datasets.

1. The user is first asked to select how the selected datasets are compared. A unique key must be selected for this purpose (peptide sequence, protein cross-linked positions, etc.).
2. Click “Compare” to generate the CSV file.



**1** Select unique key to apply for comparison:

Unique key:

Display peptide count:

Comparison will be done for:  
 [3] BSA\_DSS\_2013-10-02 filtered

**2**

The CSV file contains the following columns:

| Column name                 | Description                                               |
|-----------------------------|-----------------------------------------------------------|
| Unique Key                  | Key used for comparison                                   |
| Dataset or run name         | Contains peptide score and peptide counts                 |
| run_name                    | MS run name                                               |
| scan_number                 | Scan number                                               |
| precursor_mz                | Precursor m/z                                             |
| precursor_charge            | Precursor charge                                          |
| Precursor_intensity         | Not available                                             |
| rank                        | Not available                                             |
| match_score                 | Peptide score                                             |
| spectrum_intensity_coverage | Ratio of MS/MS matched peaks intensity by total intensity |
| total_fragment_matches      | Number of matched fragments                               |
| delta                       | Delta score between the first and second matches          |
| error                       | Precursor mass error in ppm                               |
| peptide1                    | Peptide sequence                                          |
| display_protein1            | Protein identifier                                        |
| peptide_position1           | Peptide position in the protein                           |
| pep1_link_pos               | Cross-linked position in the peptide                      |
| peptide2                    | Peptide sequence                                          |
| display_protein2            | Protein identifier                                        |
| peptide_position2           | Peptide position in the protein                           |
| pep2_link_pos               | Cross-linked position in the peptide                      |
| autovalidated               | True or false value (Xi only)                             |
| validated                   | Manual validation (Xi only)                               |
| rejected                    | Manual validation (Xi only)                               |
| notes                       | Notes                                                     |

Note that only a single peptide-spectrum match is displayed per cross-link. A summary of peptide count and peptide score sum is provided at the bottom for each dataset.

## 6.8. Export as Interaction matrix

This action is accessed from the “Dataset” views after selecting the desired datasets. It generates a CSV file that contains a matrix of cross-links count and the sum of cross-linked peptide scores between proteins.

## 6.9. Export as Percolator TSV

This action is accessed from the “Dataset” views after selecting the desired datasets. It generates a TSV file to be used with Percolator (see section 5.3 for automated Percolator filtering).

The TSV file contains the following columns:

| Column name | Description                                      |
|-------------|--------------------------------------------------|
| ClPeptideId | CLMSVault peptide identifier                     |
| Label       | 1 (target) or -1 (decoy)                         |
| ScanNr      | Scan number                                      |
| Score       | Peptide score                                    |
| dScore      | Delta score between the first and second matches |
| Charge      | Peptide charge                                   |
| Mass        | Peptide mass                                     |
| PPM         | Mass error in ppm                                |
| LenShort    | Length of the shortest peptide                   |
| LenLong     | Length of the longest peptide                    |
| LenSum      | Sum of peptide lengths                           |
| Peptide     | Cross-linked peptide sequences and positions     |
| ProteinId1  | Protein identifier                               |
| ProteinId2  | Protein identifier                               |

## 6.10. Export as Xi CSV

This action is accessed from either the “CL Peptides” or the “Dataset” views after selecting the desired objects. It generates a CSV file of cross-linked peptides in the Xi format.

The CSV file contains the following columns:

| Column name                 | Description                                               |
|-----------------------------|-----------------------------------------------------------|
| run_name                    | MS run name                                               |
| scan_number                 | Scan number                                               |
| precursor_mz                | Precursor m/z                                             |
| precursor_charge            | Precursor charge                                          |
| Precursor_intensity         | Not available                                             |
| rank                        | Not available                                             |
| match_score                 | Peptide score                                             |
| spectrum_intensity_coverage | Ratio of MS/MS matched peaks intensity by total intensity |
| total_fragment_matches      | Number of matched fragments                               |
| delta                       | Delta score between the first and second matches          |
| error                       | Mass error in ppm                                         |
| peptide1                    | Peptide sequence                                          |
| display_protein1            | Protein identifier                                        |
| peptide_position1           | Peptide position in the protein                           |
| pep1_link_pos               | Cross-link position in the peptide                        |
| peptide2                    | Peptide sequence                                          |
| display_protein2            | Protein identifier                                        |
| peptide_position2           | Peptide position in the protein                           |
| pep2_link_pos               | Cross-link position in the peptide                        |
| autovalidated               | True or false value (Xi only)                             |
| validated                   | Manual validation (Xi only)                               |
| rejected                    | Manual validation (Xi only)                               |
| notes                       | Not available                                             |

## 6.11. Export as Xi CSV with distance

This action is accessed from either the “CL Peptides” or the “Dataset” views after selecting the desired objects. It generates a CSV file of cross-linked peptides in the Xi format with cross-link inter-residue distance.

1. Select your desired PDB models and set your alignment threshold.
2. Click “View”.

The screenshot shows a web interface for PDB selection and alignment threshold setting. It is divided into two main sections: "PDB selection" and "Alignment threshold".

**PDB selection**

- Pdb identifier:** A text input field with a placeholder text: "Enter PDB identifier or use BLAST feature below to get a suggestion."
- Pdb select:** A dropdown menu showing "4F5S - crystal structure of bovine serum albumin".

**Alignment threshold**

- Protein identity:\*** A text input field with the value "0.7".
- Peptide identity:\*** A text input field with the value "0.7".

Below the alignment threshold section is a blue "View" button.

BLAST protein sequence against PDB  
P02769

The CSV file contains these additional columns:

| Column name  | Description                     |
|--------------|---------------------------------|
| min_distance | Minimum inter-residues distance |
| distances    | All inter-residues distances    |

## 6.12. Export as PSI-MI TAB 2.5

This action is accessed from the “Dataset” views after selecting the desired objects. It exports the list of protein interactions in PSI-MI TAB 2.5 format.

### 6.13. Export as PSI-MI XML 2.5

This action is accessed from the “Dataset” views after selecting the desired objects. It exports the list of protein interactions in PSI-MI XML 2.5 format.

### 6.14. Export as xTract CSV

This action is accessed from either the “CL Peptides” or the “Dataset” views after selecting the desired objects. It generates a CSV file to be used for label-free quantification with xTract (<http://proteomics.ethz.ch/cgi-bin/xtract/cgi/index.cgi>). Note that retention times are extracted from peak list for some search algorithms (refer to section 4.3).

### 6.15. Export as ProteoProfile CSV

This action is accessed from either the “CL Peptides” or the “Dataset” views after selecting the desired objects. It generates a CSV file to be used for label-free quantification with ProteoProfile (<https://proteomics.irc.ca/tools/ProteoProfile/>).

The CSV file contains the following columns:

| Column name         | Description                  |
|---------------------|------------------------------|
| Search Log Num      | Not available                |
| FileName            | MS run file name             |
| idlpeptide          | CLMSVault peptide identifier |
| UniProt ID          | Protein identifiers          |
| UniProt URL         | Not available                |
| PIR URL             | Not available                |
| EntrezID            | Not available                |
| Entrez URL          | Not available                |
| Protein Description | Protein description          |
| Species             | Species name                 |
| Mass                | Not available                |
| Num of Peptides     | Not available                |
| Peptide QueryNum    | Not available                |
| Peptide Sequence    | Peptide sequences            |

|                       |                                                                             |
|-----------------------|-----------------------------------------------------------------------------|
| Pep Modification      | Cross-link type and position                                                |
| Protein Assignments   | Not available                                                               |
| Peptide Start         | Peptide start position in protein 1 dot-peptide start position in protein 2 |
| Peptide End           | Peptide end position in protein 1 dot-peptide end position in protein 2     |
| Pep Score             | Peptide score                                                               |
| Pep Rank              | Not available                                                               |
| Pep Observed Mz       | Peptide observed m/z                                                        |
| Pep Calc Mass         | Not available                                                               |
| Peptide Observed Mass | Peptide Observed Mass                                                       |
| Peptide Charge        | Peptide charge                                                              |
| Pep Elution Time      | Not available                                                               |
| Pep Sample File       | Not available                                                               |
| Peptide URL           | Not available                                                               |
| Protein Score         | Not available                                                               |
| Prot. PI              | Not available                                                               |
| Prot. Seq Length      | Not available                                                               |
| Seq Coverage          | Not available                                                               |
| PubMedID              | Not available                                                               |
| MedLineID             | Not available                                                               |
| Scan Number           | Scan Number                                                                 |

## 7. Administrative task

### 7.1. Add new user

To add a new user to CLMSVault, use the following steps as an administrator user:

1. From the main screen, click on “Administration” to expand the menu.
2. Click on “Add” in the Users row.

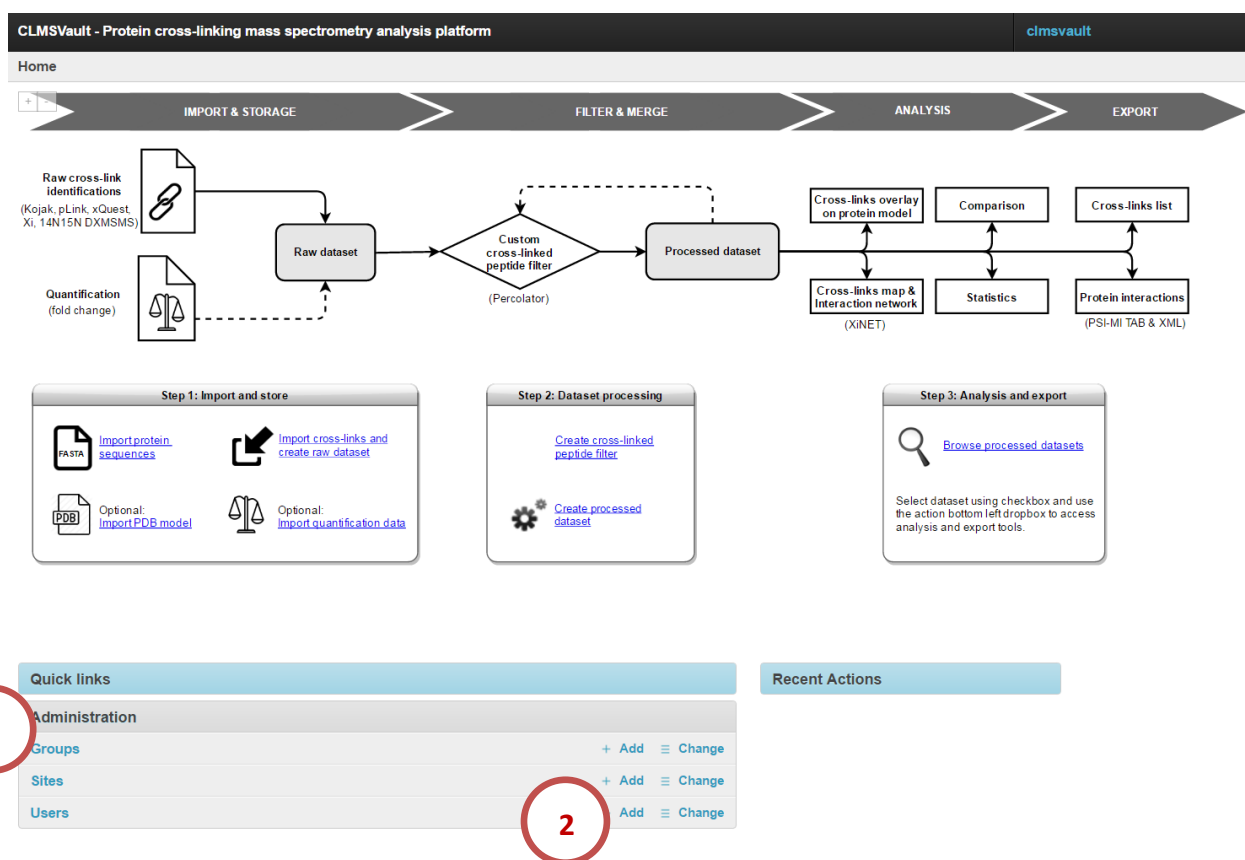

3. Fill the form.
4. Click “Save”.

## Add user

|                       |                                                                    |          |
|-----------------------|--------------------------------------------------------------------|----------|
| Username              | <input type="text"/>                                               |          |
|                       | Required. 30 characters or fewer. Letters, digits and @/!+!-_only. |          |
| Password              | <input type="password"/>                                           | <b>3</b> |
| Password confirmation | <input type="password"/>                                           |          |
|                       | Enter the same password as above, for verification.                |          |

 CLMSVault by Mathieu Courcelles is licensed under a [Creative Commons Attribution-NonCommercial 4.0 International License](#). Copyright © 2012-2015 IRIC - Mike Tyers lab.

**4**

|                                                          |                                                     |                                     |
|----------------------------------------------------------|-----------------------------------------------------|-------------------------------------|
| <input type="button" value="Save and continue editing"/> | <input type="button" value="Save and add another"/> | <input type="button" value="Save"/> |
|----------------------------------------------------------|-----------------------------------------------------|-------------------------------------|

5. Fill the next form to add further details or permissions to the user. Every user should have “Staff” status activated and be in the “ms\_expert” group.
6. Click “Save” to finish.



### Change user

**Username**   
Required. 30 characters or fewer. Letters, digits and @/./+/-/\_ only.

**Password** **algorithm:** pbkdf2\_sha256 **iterations:** 12000 **salt:** 4JyVgo\*\*\*\*\* **hash:** anCSSj\*\*\*\*\*  
Raw passwords are not stored, so there is no way to see this user's password, but you can change the password using [this form](#).

**Personal info**

First name

Last name

Email address

**Permissions**

**Active**  
Designates whether this user should be treated as active. Unselect this instead of deleting accounts.

**Staff status**  
Designates whether the user can log into this admin site.

**Superuser status**  
Designates that this user has all permissions without explicitly assigning them.

**Groups**

| Available groups                    | Chosen groups |
|-------------------------------------|---------------|
| <input type="text" value="Filter"/> | ms_expert     |

5

5

6
